1  
2  
3  
4  
5  
6  
7  
8  
9  
10  
11  
12  
13  
14  
15  
16  
17  
18  
19  
20  
21  
22  
23  
24

**DONSON and FANCM associate with different replisomes distinguished by replication timing and chromatin domain**

Jing Zhang<sup>1</sup>, Marina A. Bellani<sup>1</sup>, Ryan James<sup>2</sup>, Durga Pokharel<sup>3</sup>, Yongqing Zhang<sup>4</sup>, John J. Reynolds<sup>5</sup>, Gavin S. McNee<sup>5</sup>, Andrew P. Jackson<sup>6</sup>, Grant S. Stewart<sup>5</sup>, Michael M. Seidman<sup>1,7</sup>

1. Laboratory of Molecular Gerontology, National Institute on Aging, National Institutes of Health, Baltimore MD 21224
2. Department of Molecular Biology and Genetics, Cornell University, Ithaca, New York, USA 14850
3. Horizon Discovery, Lafayette, CO, USA 80026
4. Gene Expression and Genomics Unit, National Institute on Aging, National Institutes of Health, Baltimore, MD 21224
5. Institute of Cancer and Genomic Sciences, College of Medical and Dental Sciences, University of Birmingham, Birmingham, UK.
6. MRC Human Genetics Unit, Institute of Genetics and Molecular Medicine, University of Edinburgh, Edinburgh, UK
7. Corresponding author

## 25 **Abstract**

26 Duplication of mammalian genomes requires replisomes to overcome numerous impediments  
27 during passage through open (eu) and condensed (hetero) chromatin. Typically, studies of  
28 replication stress characterize mixed populations of challenged and unchallenged replication forks,  
29 averaged across S phase, and model a single species of “stressed” replisome. However, in cells  
30 containing potent obstacles to replication, we find two different lesion proximal replisomes. One  
31 is bound by the DONSON protein and is more frequent in early S phase, in regions marked by  
32 euchromatin. The other interacts with the FANCM DNA translocase, is more prominent in late S  
33 phase, and favors heterochromatin. The two forms can also be detected in unstressed cells. CHIP-  
34 seq of DNA associated with DONSON or FANCM confirms the bias of the former towards regions  
35 that replicate early and the skew of the latter towards regions that replicate late.

## 36 **Introduction**

37 Eukaryotic replisomes are multiprotein complexes consisting, minimally, of the CMG  
38 helicase [MCM2-7 (M), CDC45 (C), and GINS (go, ichi, ni, san) proteins (G)] which forms a ring  
39 around the leading strand template. Other components include the pol  $\alpha$ ,  $\epsilon$ , and  $\delta$  polymerases,  
40 MCM10, and a few accessory factors <sup>1-7</sup>. The identification and characterization of the minimal  
41 components of biochemically active replisomes, the result of decades of extraordinary work from  
42 multiple laboratories, necessarily reflects studies with deproteinized model DNA substrates under  
43 carefully controlled conditions. However, *in vivo* there are hundreds of replisome associated  
44 proteins <sup>8-12</sup>. Presumably this reflects the multiple layers of complexity that characterize replication  
45 of the genome in living cells. For example, three dimensional analyses of chromosome structure  
46 demonstrate two major domains. The A compartment contains euchromatin, which is accessible,  
47 transcriptionally active, and marked by specific histone modifications, such as H3K4me3. The B  
48 compartment, which is more condensed, contains inactive genes, many repeated elements, and is  
49 associated with different histone modifications, including H3K9me3 <sup>13</sup>. In addition to the structural  
50 distinctions, regions of the genome are also subject to temporal control of replication during S  
51 phase. Sequences in Compartment A tend to replicate early in S phase, while those in B are  
52 duplicated in late S phase <sup>14,15</sup>.

53 Other influential effectors of replisome composition are the frequent encounters with  
54 impediments, that stall or block either the progress of the CMG helicase or DNA synthesis. These

55 include alternate DNA structures, protein: DNA adducts, DNA covalent modifications introduced  
56 by endogenous or endogenous reactants, depleted nucleotide precursor pools, etc. Replication  
57 stress activates the ATR (ATM- and Rad3-related) kinase, with hundreds of substrates, including  
58 MCM proteins<sup>16-18</sup>, and stimulates the recruitment of numerous factors to stalled replication forks  
59<sup>19-22</sup>. These function in a variety of pathways to relieve obstacles, reconstruct broken forks, and  
60 restart replication.

61 We have developed an approach to studying replication stress imposed by an interstrand  
62 crosslink (ICL). While these have always been considered absolute blocks to any process requiring  
63 DNA unwinding<sup>23,24</sup>, we found that replication could restart (traverse) past an intact ICL in the  
64 genome of living cells<sup>25</sup> (see also<sup>26</sup>). Traverse of the ICL was dependent on ATR, and, in part, on  
65 the translocase activity of FANCM<sup>27,28</sup>. FANCM was recruited to ICL proximal replisomes which  
66 were marked by phosphorylation of MCM2 by ATR. Furthermore, the association with FANCM  
67 was accompanied by remodeling of replisomes characterized by the loss of the GINS complex<sup>29</sup>.

68 The partial dependence of ICL traverse on FANCM raised the question of what other  
69 factor(s) would support this activity. Recently, the DONSON protein was described as mutated in  
70 a microcephalic dwarfism syndrome<sup>30,31</sup>. This essential protein, which has no recognizable  
71 structural features, associates with replisomes and contributes to the response to replication stress.  
72 In the work described here we find that, like FANCM, DONSON is complexed with ICL proximal  
73 replisomes also lacking the GINS proteins. The two “stressed” replisomes are distinguished by  
74 activity in different stages of S phase and different chromatin regions. In cells without ICLs  
75 DONSON and FANCM associate with sequences that show the same differential biases in  
76 replication timing and chromatin domain.

## 77 **Results**

### 78 *DONSON contributes to ICL traverse*

79 We have developed an approach to following replication in the vicinity of antigen tagged  
80 ICLs. Cells were treated with Digoxigenin-trimethylpsoralen and long wave ultraviolet light (Dig-  
81 TMP/UVA) and pulsed sequentially with CldU and IdU prior to spreading DNA fibers. Staining  
82 of the incorporated analogues and the Dig tag displays the outcomes of fork encounters with ICLs  
83 **(Fig. 1a) (Supplementary Fig. 1a, b)**. Replication restart past ICLs (traverse) was reduced in cells

84 deficient for FANCM, as shown previously<sup>25</sup>. Recently, the DONSON protein was shown to  
85 contribute to the cellular response to replication stress<sup>30,31</sup>. While DONSON does not appear to  
86 be a conventional DNA repair factor (it was not important for survival of cells exposed to cisplatin,  
87 **Supplementary Fig. 1c**), reduced expression of DONSON, either by siRNA knockdown (**Fig. 1b**,  
88 **Supplementary Fig. 1d**), or by mutation in patient derived cells (**Supplementary Fig. 1e**), did  
89 influence the results of the replication/fiber assay. Traverse frequency was reduced in these cells  
90 and declined further in doubly deficient cells, indicating that DONSON and FANCM were non  
91 epistatic for ICL traverse (**Fig. 1b**).

92 A relationship with replication and the replisome was indicated by co-immunoprecipitation  
93 of the endogenous DONSON protein or a GFP tagged DONSON with MCM proteins from  
94 untreated cells (no TMP/UVA) consistent with the prior report<sup>30</sup>. DONSON was also complexed  
95 with CDC45 and the GINS proteins indicating association with the helicase functional form of the  
96 replisome (**Supplementary Fig. 1f**), in contrast to replisomes bound by FANCM<sup>29</sup>. Proximity  
97 ligation assays (PLA) confirmed these interactions (**Supplementary Fig. 1g**). After TMP/UVA  
98 treatment, the association with MCM proteins and CDC45 was maintained while the interaction  
99 with PSF1, a GINS protein, was reduced (**Fig. 1c**). In the treated cells, PLA reported the proximity  
100 of DONSON and MCM proteins and also pMCM2S108, phosphorylated by ATR at S108 (**Fig.**  
101 **1d**). The PLA between DONSON and PSF1 was positive in control cells and reduced in  
102 TMP/UVA cells (**Fig. 1e**) in agreement with the IP. These data demonstrated the association of  
103 DONSON with replisomes in cells with or without TMP/UVA treatment. Furthermore, they  
104 distinguished DONSON from FANCM, which, as shown previously, was not in complex with  
105 GINS proteins in either condition<sup>29</sup>.

106 Inhibition of ATR blocks the association of FANCM with replisomes<sup>29</sup>. In contrast, the PLA  
107 between DONSON and the ICLs was positive in control cells and increased after ATR inhibition  
108 (**Fig. 1f**). Thus, the response to ATR inhibition also differentiated the DONSON: replisome from  
109 the FANCM: replisome. These results are explained by a scenario in which encounters of  
110 DONSON: replisomes with ICLs are accompanied by the loss of GINS and traverse of the ICL. In  
111 the presence of the ATR inhibitor those replisomes accumulate at ICLs, traverse is blocked, and  
112 the GINS retained.

113 *DONSON and FANCM are on different replisomes*

114 To determine if FANCM and DONSON were on the same replisomes we performed a  
115 sequential immunoprecipitation (IP) experiment (**Fig. 2a**). Chromatin was prepared from GFP-  
116 DONSON cells exposed to TMP/UVA, the DNA digested, and protein complexes incubated with  
117 antibody against PSF1, which served as a marker of a fully functional, “non stressed”, replisome.  
118 The precipitate contained the target PSF1, MCM2, DONSON, but neither FANCM nor  
119 pMCM2S108 (**Fig. 2b**). A second cycle of IP confirmed clearance of these replisomes  
120 (**Supplementary Fig. 2a**). The supernatant was then incubated with antibody against GFP-  
121 DONSON. The IP contained GFP-DONSON and pMCM2S108, but no FANCM and, as expected,  
122 no PSF1. After another IP against GFP-DONSON, the remaining supernatant was incubated with  
123 antibody against FANCM. This IP contained FANCM, pMCM2S108, but no DONSON and no  
124 PSF1. Reversal of the order of the IP (FANCM before DONSON) did not change the results  
125 (**Supplementary Fig. 2b**). Thus, there were two DONSON associated replisomes: 1) replisome:  
126 CMG-D, independent of TMP/UVA, not marked by ATR phosphorylation, associated with the  
127 GINS; 2) replisome: CM-D, induced by TMP/UVA, with pMCM2S108 but not PSF1 or FANCM.  
128 The FANCM complex, replisome: CM-F, had pMCM2S108, but no GINS or DONSON. CDC45  
129 and the auxiliary proteins MCM10, MCM8, and RAD51, were found in all samples  
130 (**Supplementary Fig. 2c**). These experiments were performed in HeLa cells expressing GFP-  
131 DONSON. In order to test the generality of these results we repeated the experiment in the hTERT  
132 immortalized diploid RPE1 cell line derived from retinal pigment epithelial cells and used in many  
133 studies of the cellular response to genotoxic stress<sup>32</sup>. They displayed the same high frequency of  
134 ICL traverse as the HeLa and DONSON complemented patient derived cells (**Supplementary Fig.**  
135 **2d**). The serial IP was performed except that antibody against the endogenous DONSON protein  
136 was employed. The results were identical to those with the GFP-DONSON HeLa cells  
137 (**Supplementary data Fig. 2e**).

138 PLA analyses with the GFP-DONSON HeLa cells agreed with the IP experiments. The  
139 interaction of DONSON with MCM2 in both UVA and TMP/UVA treated cells was positive (**Fig.**  
140 **2c**). The PLA between FANCM and MCM2, which was detectable but low in cells without ICLs,  
141 was greatly increased in cells treated with TMP/UVA, while the PLA between DONSON and  
142 FANCM was negative in control and TMP/UVA treated cells.

143 We then tested the replisomes for association with ICLs. We treated cells with Dig-  
144 TMP/UVA and performed a sequential immunoprecipitation on chromatin sonicated to small DNA  
145 fragment size (sequential CHIP) in the order as in Fig. 2a. The DNA from each IP was recovered  
146 and examined for the presence of the Dig tag. There was no signal in the PSF1 sample, but both  
147 the subsequent precipitates were positive. Consequently, the ICLs were associated with replisomes  
148 containing CM-DONSON and CM-FANCM, but not CMG-DONSON (**Fig. 2d, e,**  
149 **Supplementary Fig. 2f**).

150 *DONSON and FANCM replisomes at early and late S phase*

151 To determine if CM-DONSON and CM-FANCM replisomes were in the same cell at the same  
152 time we performed sequential PLA on TMP/UVA treated cells grown on plates marked to facilitate  
153 re analysis of the same cells (**Fig. 3a, Supplementary Fig. 3a**). Images were taken of the  
154 DONSON: pMCM2S108 PLA, the plates were stripped of antibodies, followed by FANCM:  
155 pMCM2S108 PLA. The cells examined in the first analysis were re-imaged and the two images  
156 aligned in x, y, z (Methods). Some cells had more DONSON: pMCM2S108 signals than FANCM:  
157 pMCM2S108, while the opposite was true for others (**Fig. 3a**). Furthermore, although some cells  
158 had signals from both assays, they did not colocalize, indicating that these replisomes were in  
159 different genomic locations (**Supplementary Movie 1**).

160 In an effort to understand the basis of these results, we treated cells with TMP/UVA and  
161 then recovered early and late S phase cells by flow cytometry (**Fig. 3b, Supplementary Fig. 3b**).  
162 The PLA between the Dig-tagged ICLs and pS108MCM2 showed equal frequencies of ICL  
163 proximal stressed replisomes in the two cell fractions (**Supplementary Fig. 3c**). DONSON:  
164 pMCM2S108 and FANCM: pMCM2S108 PLAs were performed on each group. The DONSON  
165 complex was about 4-fold more frequent in early S phase than in late, while the FANCM complex  
166 was about 10-fold more frequent in late S phase than in early (**Fig. 3c, d**). The negative PLA for  
167 both partner sets in G<sub>1</sub> phase cells provided an important internal control for the specificity of the  
168 reagents and assay (**Supplementary Fig. 3d**).

169 The clear distinction between the early and late S phase fractions reflected the separation of  
170 the early S phase cells from those in late S phase. On the other hand, when we examined mid S  
171 phase cells the pronounced difference between the PLA frequencies of the two stressed replisomes

172 was lost, indicating that both stressed replisomes were present in mid S phase cells  
173 (**Supplementary Fig. 3e**).

174 The influence of DONSON on replication fork encounters with ICLs in the early and late  
175 stages of S phase was tested in cells treated with siRNA/DONSON. There was an increase in single  
176 fork stalling events and a decline in traverse frequency in the early S phase cells, while there was  
177 little change in late S phase cells (**Fig. 3e, f**). Conversely, in cells treated with siRNA/FANCM  
178 there was an increase in single fork stalling and a decline in traverse frequency in late S phase  
179 cells, with relatively little effect on early S phase patterns (**Fig. 3e, f**). Thus, the DONSON: stressed  
180 replisome made a greater contribution to the traverse patterns in early S phase than in late, while  
181 the FANCM: replisome was more important in late S phase. Consequently, deficiencies in one or  
182 the other would differentially influence the outcome of replisome encounters with ICLs depending  
183 on the stage of S phase.

184 Alu sequences are replicated in early S phase, Satellite 3 sequences are replicated in late S  
185 phase, while LINE-1 elements are replicated throughout<sup>33</sup>. Cells were treated with TMP/UVA and  
186 DNA isolated from each fraction from the sequential CHIP (as in Fig. 2f) and examined for the  
187 presence of these repeats. As expected, the replisome marked by PSF1 was associated with all the  
188 sequences. However, the recovery of Alu sequences was biased towards the replisome: CM-  
189 DONSON fraction, while the recovery of Satellite 3 was greater with the replisome: CM-FANCM  
190 (**Fig. 4a**). LINE-1, which replicates throughout S phase, was found in all fractions.

191 Active genes replicate in early S phase, and are found in euchromatin, marked by histone  
192 H3K4 trimethylation<sup>34</sup>, while inactive genes replicate late, and are in heterochromatin,  
193 characterized by H3K9 trimethylation<sup>35</sup>. We treated cells with TMP/UVA and examined the  
194 proximity of GFP-DONSON to the two chromatin marks in early and late S phase cells. The PLA  
195 with H3K4me3 showed a 4-fold higher signal frequency in early S phase than in late, while the  
196 PLA with H3K9me3 was much weaker in both stages (**Fig. 4b**). The PLA between FANCM and  
197 H3K4me3 was quite low in both early and late S phase cells, while the signal with H3K9me3 was  
198 about 10-fold stronger in late S phase than in early S phase cells (**Fig. 4c**). These experiments were  
199 repeated in RPE1 cells with identical results (**Supplementary Fig. 4a, b**). They were also  
200 confirmed by sequential chromatin IP in both cell lines which showed that H3K4me3 was  
201 associated with the replisome: CM-DONSON complex, while the replisome: CM-FANCM was

202 associated with H3K9me3 (**Fig. 4d, Supplementary Fig. 4c**). The results of these experiments  
203 confirmed the appearance of replisomes differing by association with either FANCM or DONSON  
204 in cells exposed to replication stress imposed by the ICLs.

#### 205 *DONSON and FANCM replisomes in untreated cells*

206 The preceding experiments characterized replisomes in cells containing ICLs and  
207 demonstrated the bias of DONSON replisomes towards early S phase. Previously, DONSON was  
208 shown to be bound to replisomes in cells without exposure to a DNA reactive compound<sup>30</sup>, leaving  
209 open the question of whether it was complexed with all replisomes, or only a subset. To address  
210 this chromatin proteins from untreated cells were subjected to sequential IP, first with DONSON  
211 as the target, after which the supernatant was incubated with antibody against PSF1 to recover  
212 remaining functional replisomes. Two complexes were recovered: replisome: CMG-DONSON  
213 and, subsequently, replisome: CMG (**Fig. 5a**). These results identified two forms of the replisome  
214 in unstressed cells: one with DONSON and one without. We then asked if DONSON replisomes  
215 in untreated cells were more or less abundant in different stages of S phase. The PLA between  
216 GFP-DONSON and PSF1 showed about a 3.5 fold bias towards early  
217 S phase (**Fig. 5b**). The proximity of FANCM to MCM2, albeit at quite low frequency (Fig 2c, **Fig.**  
218 **5c**), was biased to late S phase in non-treated cells (**Fig. 5c**). The low frequency interaction of  
219 FANCM with replisome proteins was also observed by immunoprecipitation (**Fig. 5d**).

220 We also asked about the proximity of DONSON and FANCM to modified histones in  
221 untreated cells. Cells were sorted and examined by PLA between GFP-DONSON or FANCM and  
222 H3K4me3 or H3K9me3. The DONSON: H3K4me3 signals were distributed throughout the nuclei  
223 and were about 3-fold more frequent in early S phase than in late, while there was little signal with  
224 H3K9me3 in either stage (**Fig. 5e**). There was minimal association between FANCM and  
225 H3K4me3 in either stage, while the interaction with H3K9me3 was weak in early S phase but  
226 about 10-fold stronger in late S phase (**Fig. 5f**). The FANCM: H3K9me3 PLA signals were largely  
227 localized on the nuclear periphery, reflecting the association of H3K9me3 chromatin with nuclear  
228 lamina<sup>36</sup>. Thus, DONSON and FANCM were largely resident in different chromatin domains  
229 without requirement for ICL induced replication stress. Similar results were acquired with RPE1  
230 cells (Supplementary **Fig. 5a, b**).

#### 231 *Association of DONSON and FANCM with genomic sequences*



232 The bias in replication timing and genome location indicated by the preceding experiments  
233 with untreated cells prompted a CHIP-seq analysis of DONSON and FANCM associated DNA in  
234 cells without ICLs (see Discussion). Chromatin was prepared, sonicated, and immunoprecipitated  
235 against GFP-DONSON or FANCM. DNA was isolated and subjected to Next Gen sequence  
236 analysis. The enrichment of FANCM and GFP-DONSON [ $\log_2(\text{ChIP}/\text{input})$ ] across individual  
237 chromosomes was compared to data on replication timing, and the Hi-C compartments A and B.  
238 The distribution of DONSON and FANCM associated sequences in most regions in chromosomes  
239 such as 1, 5, 9 matched well with the replication timing and Hi-C A and B compartments,  
240 respectively (**Fig. 6a, Supplementary Fig. 6a, c**). Chromosomes such as 6, 10, 12, showed little  
241 overlap between DONSON and FANCM, but the correlations with early and late replicating DNA  
242 and the A and B compartments were not as strong (**Supplementary Fig. 6b, d, e**). Additionally,  
243 there were chromosomes (14, 15) in which the DONSON and FANCM signals were intermingled  
244 (**Supplementary Fig. 6f, g**). There was no correspondence between the regions associated with  
245 DONSON or FANCM and fragile sites in any chromosome. Violin plots of DONSON and  
246 FANCM associated DNA sequences (across the entire genome) that were enriched relative to the  
247 input were skewed towards sequences that were early replicating and in compartment A or late  
248 replicating and in compartment B, respectively (**Fig. 6b**).

249 In order to evaluate the relationship between DONSON and FANCM across the entire  
250 genome and early or late replicating loci, we calculated the coverage of the respective ChIP-seq  
251 results in replication timing quantiles in the cells. As proof of principle, we also calculated the  
252 coverage of H3K9me3 and H3K4me3 histone marks, using published data (Methods). As  
253 expected, the permissive chromatin mark H3K4me3 was progressively enriched towards early  
254 replicating regions of the genome, while the repressive histone mark H3K9me3 was progressively  
255 enriched towards late replicating regions. FANCM Chip-seq data were increasingly enriched  
256 towards late replicating regions, similar to H3K9me3 (**Fig. 6c**). The DONSON Chip-seq showed  
257 a bias towards the quantiles that associated with early replication, although it was not as  
258 pronounced as the FANCM linkage to late replication. Another comparison was to the continuum  
259 of A – B chromatin compartments defined by Hi-C. Again, there was a clear bias in the sequences  
260 captured by FANCM towards the B compartment associated with silent chromatin and late  
261 replicating sequences. DONSON bound sequences were weighted towards the A compartment,  
262 but not as strongly as H3K4me3 (**Fig. 6d**).

## 263 Discussion

264 In living cells many more proteins associate with replisomes than are required for “minimal”  
265 biochemical reconstructions<sup>37,12</sup>. These interactions may be constitutive or induced by replication  
266 stress, but are typically interpreted as representing a single complex (see Introduction)<sup>15,22,38-42</sup>.  
267 An alternative view, that there are multiple, distinguishable, replisome variants, either constitutive  
268 or in response to stress, has received less attention. Our results demonstrate two compositionally  
269 different replisomes in “unstressed” cells, and an additional two in cells containing potent blocks  
270 to replication. Furthermore, we find that the different replisomes are also distinguished by  
271 replication timing and chromatin location.

272 DONSON bound replisomes were constitutively more prevalent in genomic regions with  
273 euchromatin histone marks, in chromatin compartment A, and were associated with early  
274 replicating elements. FANCM was more frequent in heterochromatin, in compartment B, and  
275 biased towards late replicating regions. The clarity of the data supporting these conclusions was  
276 dependent on experiments in which cells from well separated stages of S phase were analyzed (the  
277 PLA experiments), or chromatin complexes containing DONSON were separated from those  
278 bound by FANCM (the sequential IP). However, for practical reasons the CHIP-seq analyses were  
279 with unsorted cells which necessarily included cells from all stages of S phase, blurring the  
280 distinction between early and late stages (see Fig. S3e). Nonetheless, the CHIP-seq data, summed  
281 over the entire genome, were in accord with the conclusions of the experiments with early and late  
282 replicating cells. The examination of the patterns from individual chromosomes revealed some in  
283 excellent agreement with the early/late bias of DONSON/FANCM, while the results with others  
284 were not as clear. Generally, the distinctions were stronger for the FANCM bound sequences than  
285 for those of DONSON, in agreement with the results from the PLA experiments. It should be noted  
286 that at best these measurements will reflect the location of DONSON and FANCM in regions of  
287 the genome rather than at specific sites defined by several nucleotides, as would be the case with  
288 transcription factors. Factors that are involved in DNA transactions that function throughout the  
289 entire genome, or in enormous domains such as those assigned to the A and B compartments, are  
290 unlikely to be present at the same location at the same time across a cell population. These  
291 considerations have also been noted in analyses of the relationship between chromatin folding  
292 compartments and replication timing<sup>15,43</sup>.

293 The presence, in active chromatin, of constitutive DONSON replisomes (replisome: CMG-  
294 D) suggests a cellular anticipation of replication stress in regions that are more susceptible to DNA  
295 damage and collisions with transcriptional R loops<sup>44-46</sup>. Thus defects in DONSON<sup>30,31</sup> would  
296 preferentially influence the response to replication stress in active gene regions of the genome.  
297 DONSON is mutant in a microcephalic dwarfism syndrome. Inefficiencies in transit through  
298 transcriptionally active gene regions<sup>47</sup> could have adverse effects on completion of S phase and  
299 consequently, cell number, resulting in the smaller brain and body size that are features of  
300 individuals with DONSON mutations.

301 On the other hand, our results indicate that in unstressed cells the association of FANCM  
302 with replisomes is infrequent. It is possible that the FANCM: replisomes in untreated cells result  
303 from encounters of replisomes with endogenous blocks. Our data demonstrate the bias of FANCM  
304 to regions that replicate late and are marked by histone modifications consistent with  
305 heterochromatin. Consequently, we suggest that replisomes that encounter blocks in these domains  
306 are in environments with associated FANCM, and ready targets for FANCM recruitment. These  
307 regions contain “difficult to replicate” sequences<sup>35</sup>. FANCM, which is an ancient protein with  
308 equivalents in archaea<sup>27</sup>, may have evolved, in part, to respond to replication blocks in sequences  
309 with a propensity to stall replication. In FANCM deficiency disorders<sup>48,49</sup> we would anticipate  
310 that the fault in at least a component of the response to replication stress would be in  
311 heterochromatin<sup>50</sup>.

312 In previous work we showed that the FANCM increment of ICL traverse was dependent on  
313 the translocase activity, while the loss of GINS required only the association of the protein,  
314 including a translocase inactive version, with the replisome complex<sup>29</sup>. Thus, the functions of the  
315 protein in the traverse assay could be separated into at least two steps. We suggest that the  
316 replication restart pathway is multi step, requiring an opening of a gate in the replisome to allow  
317 the replisome to move past the ICL. Whether this is the gate between MCM2-MCM5, which would  
318 be unlocked by the loss of the GINS<sup>51</sup>, or an alternative gate which can open independently of the  
319 GINS status<sup>52,53</sup> remains to be determined<sup>54</sup>. Additionally, the translocase activity of FANCM  
320 could be required for moving the opened replisome past the ICL or modulating DNA structure  
321 once past the barrier. These are not exclusive possibilities.

322 In contrast to FANCM, DONSON has no enzymatic activity. Consequently, it may serve as  
323 a recruitment platform for factors that promote the stability of replication forks that encounter

324 obstacles in early and mid S phase. For example, these might include enzymes such as  
325 SMARCAL1 and ZRANB3 that protect forks from collapse, and would provide a translocase  
326 activity, perhaps similar to FANCM<sup>55,56</sup>. DONSON has also been demonstrated to be required for  
327 efficient activation of the ATR-dependent replication stress response<sup>30</sup>.

328 Eu- and hetero-chromatin domains are not absolute, but subject to alteration during  
329 development, neoplasia, and aging<sup>35,57,58</sup>. It will be of interest to determine the influence of these  
330 changes on the response to replication stress by DONSON and FANCM associated replisomes.

### 331 **Methods**

#### 332 **Data reporting**

333 Statistical methods were not used for sample size determination. The experiments were not  
334 randomized, and the investigators were not blinded during experiments and data analysis.

#### 335 **Materials**

336 Dig-TMP was synthesized as described previously<sup>25</sup>. The siRNA for DONSON and FANCM  
337 were purchased from Dharmacon. L-017453-02-0005, ON-TARGETplus Human DONSON  
338 siRNA SMART pool (GAAAUCAUCUUUACGGAAU, UGGACAAAGUACUUGA UAU,  
339 GAGAUGGGUGUGCAAGAU, ACUUAGUCAAAUACCGUUA). L-021955-00-0005, ON-  
340 TARGETplus Human FANCM siRNA – SMART pool (GGGUA GAACUGGCCGUA, GAGAGGAACGUAUUUUAUAA,  
341 AAACAGACAUCGCUGAAUU, GCAUGUAGCUAGG  
342 AAGUUU). Other reagents were Lipofectamine RNAiMAX (Invitrogen, 13778-150), Halt™  
343 Protease and Phosphatase inhibitor cocktail (Thermo Scientific, 78446) and ATR inhibitor  
344 (VE821, Selleckchem, S8007).

#### 345 **Cells, cell culture, transfection**

346 HeLa CCL-2 and RPE1 (ATCC) cells were maintained in DMEM (Gibco) supplemented with  
347 10% fetal calf serum (Gibco), 100 U/mL penicillin, and 100 µg/mL streptomycin sulfate (Gibco).  
348 GFP-DONSON expressing HeLa cells<sup>30</sup> were cultured with L-Glutamine (Gibco), 200 µg/ml  
349 Hygromycin B (Invitrogen), and 5 µg/ml Blasticidin (Gibco). HeLa-Flp-In T-REx cells stably  
350 transfected with pcDNA5/FRT/TO-EGFP expressing EGFP or EGFP-DONSON were induced  
351 by incubation with 1 µg/ml Doxycycline for 48 hr. Cells derived from patient 9 with mutations in  
352 DONSON<sup>30</sup>, stably transduced with pMSCV-vector only or pMSCV-DONSON, were grown in  
353 DMEM (Gibco) supplemented with 10% fetal calf serum (Gibco), L-Glutamine (Gibco), 100

354 U/mL penicillin, 100 µg/mL streptomycin sulfate (Gibco). All cells were routinely tested for  
355 mycoplasma (Lonza, LT07-701). To determine the effect of knock down of DONSON and  
356 FANCM in the DNA fiber assay, Hela cells were transfected with 10 nM siRNA (Dharmacon)  
357 using RNAiMAX (Invitrogen) on day 1 and day 2. Experiments were performed on day 4, ie.72  
358 hr after siRNA transfection.

### 359 **Chromatin extraction and Immunoprecipitation**

360  $10^7$  cells were suspended in buffer A (10 mM HEPES at pH 7.9, 10 mM KCl, 1.5 mM MgCl<sub>2</sub>,  
361 0.34 M sucrose, 10% glycerol, 1 mM DTT, 10 mM NaF, 1 mM sodium orthovanadate, 0.1% Triton  
362 X-100, with protease and phosphatase inhibitors) and incubated for 5 mins on ice. Nuclei were  
363 recovered by centrifugation at 1300 g for 4 min. The nuclear pellet was lysed in buffer B (3 mM  
364 EDTA, 0.2 mM EGTA, 1 mM DTT, protease and phosphatase inhibitors) for 10 min on ice, and  
365 then centrifuged at 1700 g for 4 min. Chromatin was resuspended in benzonase buffer (Sigma,  
366 E8263, 250 U/mL benzonase, 20 mM Tris-HCl at pH 8.0, 0.2 mM MgCl<sub>2</sub>, 2 mM NaCl, protease  
367 and phosphatase inhibitors and incubated at 4 °C overnight. Another 250 U/ml benzonase was  
368 added and the sample incubated for an additional 3 hrs. The sample was clarified by centrifugation  
369 and the supernatant adjusted to 200 mM NaCl, 50 mM Tris-HCl pH 7.4, 0.1% Tween 20.

370 For immunoprecipitation, soluble chromatin samples were precleaned with Dynabeads Protein G  
371 (Life Technologies) for 1h at room temperature. Then incubated with specific antibodies at 4 °C  
372 overnight. For sequential Co-IP, immunoprecipitations were performed using protein G magnetic  
373 beads (Pierce, 10% v/v), GFP Trap (Chromotek, gta-20). We performed each immunocapture  
374 twice, in order to clear the target complex. After capture with one antibody was completed the  
375 supernatant was incubated with the next antibody, and so on. All bead-antibody complexes were  
376 washed three times with PBS-T (phosphate buffered saline, .05% Tween-20. pH 7.5) and  
377 resuspended in SDS PAGE loading buffer. After heating for 10 min at 90 °C, the proteins were  
378 analyzed by western blotting according to standard procedures.

### 379 **In situ Proximity Ligation Assay (PLA)**

380 Cells were grown on Mattek glass bottomed plates followed by treatment with 5 µM Dig-  
381 TMP/UVA, 1.5 µM TMP/UVA, or UVA only. UVA exposure was in a Rayonet chamber at 3  
382 J/cm<sup>2</sup>. After incubation with fresh medium for 60 min, cells were incubated with 0.1 %  
383 formaldehyde for 5 min and then treated twice with CSK-R buffer (10 mM PIPES, pH 7.0, 100  
384 mM NaCl, 300 mM sucrose, 3 mM MgCl<sub>2</sub>, 0.5% Triton X-100, 300 µg/ml RNase) and fixed in

385 4% formaldehyde in PBS (W/V) for 10 min at RT, followed by incubation in pre-cold methanol  
386 for 20 min at -20 °C. After washing with PBS cells were treated with 100 ug/ml RNase for 30 min  
387 at 37 °C. *In situ* PLA was performed using the Duolink PLA kit (Sigma-Aldrich) according to the  
388 manufacturer's instructions. Briefly, cells were blocked for 30 min at 37 °C and incubated with  
389 the respective primary antibodies (see reagent list) for 30 min at 37 °C. Following three times  
390 washing with PBST (phosphate buffered saline, 0.1% Tween), anti-Mouse PLUS and anti-Rabbit  
391 MINUS PLA probes were coupled to the primary antibodies for 1 h at 37 °C. After three times  
392 washing with Buffer A (0.01 M Tris, 0.15 M NaCl and 0.05% Tween 20) for 5 min, PLA probes  
393 were ligated for 30 min at 37 °C. After three times washing with Buffer A, amplification using  
394 Duolink In Situ Detection Reagents (Sigma) was performed at 37 °C for 100 min. After  
395 amplification, cells were washed for 5 min three times with Wash Buffer B (0.2 M Tris 0.1 M  
396 NaCl). Finally, they were coated with mounting medium containing DAPI (Prolong Gold,  
397 Invitrogen). Antibody specificity was confirmed by omitting one or another antibody. In some  
398 experiments, after completion of the PLA procedure, the stage of S phase was determined by  
399 immunostaining of cells with an antibody against PCNA conjugated with Alexa 647.

#### 400 **PLA imaging and quantification**

401 PLA plates were imaged on a Nikon TE2000 spinning disk confocal microscope, using a Plan  
402 Fluor ×60/1.25 numerical aperture oil objective. All images in an experiment were acquired with  
403 the same exposure parameters. Quantification was done on CellProfiler using the pipeline provided  
404 as Supplementary Information 2. Briefly, the pipeline performs the following steps: identify nuclei  
405 using the DAPI channel, filter to a maximum size the PLA foci, mask the foci image using the  
406 nuclei objects (PLA foci) to generate a visual representation of the foci counted for each cell,  
407 identify primary objects (PLA foci), establish a parent-child relationship between the foci  
408 (“children”) and nuclei (“parents”) in order to determine the number of foci per nucleus and export  
409 results as number of PLA foci per nucleus to a spreadsheet. The spreadsheets were compiled in  
410 Excel and exported to Graphpad Prism to generate the dot plots and determine if differences were  
411 statistically significant using the Mann-Whitney Rank sum test (NS:  $p > 0.5$ , significant:  $p < 0.001$ ).

#### 412 **Sequential PLA and 3D reconstruction**

413 Mattek glass bottomed plates were marked on the growth surface with a diamond pen prior to  
414 plating cells in order to provide a reference for location of individual microscope fields<sup>59</sup>. GFP-  
415 DONSON: pMCM2S108 PLA was performed as above, with Duolink Detection Reagent Green

416 (Sigma, DUO92014) or Orange (DUO92007). Bright field images of the individual fields were  
417 obtained as well as the patterns of the PLA. The plates were then incubated with 6 M Guanidine:  
418 HCl in 5 % sucrose for 10 min at 40 °C to strip the antibodies and reaction products, and then  
419 washed with PBST. The fields were inspected to ensure complete removal of signal after which  
420 the FANCM: pMCM2 S108 PLA was performed, with detection oligonucleotides linked to  
421 Duolink Detection Reagent Red (Sigma, DUO92013). The cells photographed after the first PLA  
422 were located and imaged again. 16 stacks covering 1.6 um were acquired of the first and second  
423 PLAs using Volocity software and exported as .OMETIFF. Both sets of images were converted  
424 into .ims to generate the 3D reconstructions on IMARIS (Bitplane) as follows. One of the sets  
425 (PLA2) was imported as a timepoint into the other set (PLA1). Next, a surface of each nuclei was  
426 created in the DAPI channel in order to track and correct for translational and rotational drift  
427 between the two PLA images. Each timepoint was then saved as the corresponding PLA, and the  
428 4 channels were finally combined into one image to confirm correct alignment of nuclei (on the  
429 DAPI channel) and visualize the localization of both PLA signals on the same cell. A 3D  
430 reconstruction of one of such merged images is provided as Supplementary Movie 1.

### 431 **DNA Fiber Analysis**

432 DNA fiber assays were performed as described previously<sup>25</sup>. Briefly, cells were incubated with 6  
433  $\mu$ M Dig-TMP at 37 °C for 1 hr, followed by exposure to UVA light in a Rayonet chamber at 3  
434 J/cm<sup>2</sup> prior to incubation with 10  $\mu$ M CldU for 20 min and then with 100  $\mu$ M IdU for 20 min.  
435 Cells were trypsinized and suspended in PBS and approximately 200 cells placed on a glass  
436 microscope slide (Newcomer Glass) and 10 ul of lysis buffer (0.5% SDS in 200 mM Tris-HCl pH  
437 7.5, 50 mM EDTA) added. DNA fibers were spread and fixed in 3:1 Methanol: Acetic acid,  
438 denatured with 2.5 M HCl for 1hr, neutralized in 0.4 M Tris-HCl pH 7.5 for 5 min, washed in PBS,  
439 and immunostained using anti-Dig, anti-BrdU primary and corresponding secondary antibodies.  
440 Antibodies and dilutions were rat anti-BrdU (CldU), 1:200; Dylight 647 goat anti-rat, 1:100;  
441 mouse anti-BrdU (IdU), 1:40; and Dylight 488 goat anti-mouse, 1:100 and Qdot 655 goat anti-  
442 mouse 1: 2,500. The slides were mounted in ProLong Gold Antifade Mounting medium. Images  
443 were acquired using a Zeiss Axiovert 200 M microscope at 63 $\times$  magnification with the Axio Vision  
444 software packages (Zeiss). The quantum dot signal was imaged with a Qdot 655 filter.

### 445 **Analysis of early and late S phase cells**

446 GFP-DONSON expressing cells were treated with 1.5  $\mu$ M TMP/UVA and after 1 hr were  
447 trypsinized and suspended in DMEM with 10 % fetal calf serum and incubated with 16  $\mu$ M  
448 Hoechst for 30 min at room temperature. The cells were centrifuged, washed with sorting buffer  
449 (HEPES pH 7.0, 1 mM EDTA, and 5 % fetal calf serum), and then suspended in 1 ml of sorting  
450 buffer supplemented with 1 mM N-acetyl cysteine. The cells were then resolved by flow cytometry  
451 and early and late S phase fractions harvested. Cells from each fraction were attached to slides by  
452 centrifugation (Cytospin), fixed with 0.1 % formaldehyde and PLA between GFP-DONSON:  
453 pMCM2S108 or FANCM: pMCM2S108 performed.

#### 454 **Chromatin Immunoprecipitation (CHIP) for DNA analysis**

455 Cells were crosslinked with 1% formaldehyde in culture media for 8 min, followed by quenching  
456 the formaldehyde with 0.1 M glycine. Cells were washed with PBS, harvested by scraping, then  
457 suspended in lysis buffer (0.5% SDS, 10 mM EDTA, 50 mM Tris-HCL pH 8.0) supplemented  
458 with protease and phosphatase inhibitors. Lysates were sonicated in a 4 °C water bath  
459 ultrasonicator (Bioruptor, Diagenode). The time of sonication was adjusted to yield short DNA  
460 fragments <500 bp (total 8 minutes, 30 seconds sonication, then cool 30 seconds). In some  
461 experiments the time was adjusted to yield longer DNA fragments of 500-5000 bp (2 x 30 seconds  
462 with a 30 second cooling period). Diluted lysates were incubated overnight at 4 °C with antibodies  
463 as indicated. Immunoprecipitations were performed using Protein G magnetic beads (Pierce, 10%  
464 v/v), or GFP Trap (Chromotek, gta-20). Bead bound complexes were washed with low salt immune  
465 complex buffer (0.1% SDS, 1% Triton x-100, 2 mM EDTA, 20 mM Tris-HCl pH 8.0, 150 mM  
466 NaCl), high salt immune complex buffer (0.1% SDS, 1% Triton x-100, 2 mM EDTA, 20 mM Tris-  
467 HCl pH 8.0, 500 mM NaCl), LiCl immune complex buffer (0.25 M LiCl, 1% NP-40, 1% mM  
468 EDTA, 10 mM Tris-HCl pH 8.0) and TE buffer (10 mM Tris-HCl, 1 mM EDTA pH 8.0). DNA  
469 was eluted in elution buffer (1% SDS, 0.2 M NaCl) with Proteinase K (100  $\mu$ g/ml) overnight at 65  
470 °C. Eluted DNA was purified with DNA Clean & Concentrator PCR purification Kit (ZYMO  
471 Research, D4033) according to the manufacturer instructions.

#### 472 **Dot blot analysis**

473 The DNA was denatured using 0.5 M NaOH and 1.5 M NaCl and equal amounts were loaded onto  
474 a Hybond N + nitrocellulose membrane (GE Biosciences) using the Bio-Dot apparatus (Bio-Rad).  
475 Membranes were washed once with denaturing buffer and wash buffer (3 $\times$  SSC), followed by UV-  
476 crosslinking (UV Stratalinker 1800, Stratagene) and blocking with 5 $\times$  Denhardt's solution



477 (Thermo Scientific) for 1 h at 37 °C. Hybridization with Alu-Biotin (5' Biotin-  
478 GGCCGGGCGCGGTGGCTCACGCCTGTAATCCAGCA), Satellite III (5' Biotin-  
479 TCCACTCGGGTTGATT) or LINE-1 (5' Biotin- GACTTCAA ACTATACTACAAGGCTACA  
480 GTAACC) probes was performed at 37 °C overnight. Chemiluminescent Nucleic Acid Detection  
481 Module Kit (Thermo Scientific, 89880) was used for signal detection and images were acquired  
482 using ChemiDox XRS with Image Lab software (Bio-Rad).

### 483 **Western blotting**

484 For a full list of antibodies, see reporting summary. The samples were prepared in NuPAGE  
485 Sample Buffer (Invitrogen). Then proteins were separated by electrophoresis in 4%–12% Bis-Tris  
486 Protein Gels and transferred to polyvinylidene difluoride membrane (Thermo Scientific). The  
487 membranes were blocked in 5% dry milk in 0.1% Tween-20 in PBS and detected with the indicated  
488 antibodies. After incubation with horseradish peroxidase (HRP)-conjugated secondary antibodies  
489 (BIO-RAD), proteins were visualized using ECL detection reagents (GE Healthcare). Uncropped  
490 gel images for western blots are available in Supplementary information 3.

### 491 **Statistics and reproducibility**

492 Statistical significance of PLA experiments was analyzed using the Mann-Whitney Rank sum test.  
493 Fiber patterns and immunoblotting were analyzed using a two-sided unpaired t-test and the exact  
494 p-values are given in each case. For both tests: Significant:  $p < 0.001$ , NS (not significant):  $p > 0.05$ .  
495 All experiments were performed at least twice and the number of biological replicates (n) is  
496 reported in each figure legend.

### 497 **CHIP-SEQ**

498 Immunoprecipitation of sonicated chromatin was performed as described above.

### 499 **DNA sequencing**

500 For DNA sequencing, Illumina sequencing adapters with a T-overhang were ligated to the  
501 precipitated ChIP DNA fragments or the input DNA, with a corresponding A-overhang, to  
502 construct a sequencing library according to the manufacturer's protocol (Illumina, San Diego, CA).  
503 The fragments were purified using a magnetic bead protocol and eighteen cycles of PCR  
504 amplification were performed to enrich for fragments with an adapter on both ends. The products  
505 were purified again with size selection (approximately 200–600 bases) using a dual bead selection  
506 protocol with SPRIselect Beads (Beckman Coulter, Brea, CA). These libraries were sequenced on  
507 an Illumina Hi-Seq 2500 sequencer using on-board cluster generation on a rapid run paired end

508 flow cell for 75 X 75 cycles (DONSON) and single end of 75 bp for 75 cycles (FANCM). Real-  
509 time analysis was performed using RTA v1.18.66.3 and base-calling was performed using  
510 bcl2fastq v2.18.0.12.

### 511 **Chip-Seq, RT and Hi-C data**

512 The log<sub>2</sub> ratio between FANCM or GFP\_DONSON ChIP-seq and the Input was computed using  
513 Deeptools BigWigCompare of the corresponding RPKM normalized BigWig files. All datasets  
514 generated in this study are deposited in the National Center for Biotechnology Information Gene  
515 Expression Omnibus (GEO) database ([https:// www.ncbi.nlm.nih.gov/geo/](https://www.ncbi.nlm.nih.gov/geo/); GEO series  
516 XXXXXXXX). H3K9me3 and H3K4me3 ChIP-seq data from HeLa cells was downloaded from  
517 *GEO*: GSM2514495 and GSM3398459, respectively. Replication Timing data for HeLa S3 cells  
518 was downloaded from the Replication Domain database, curated by the Gilbert  
519 laboratory(<https://www2.replicationdomain.com/#>): RT\_HeLaS3\_CervicalCarcinoma\_Int 2355  
520 8071\_hg38. Hi-C data for HeLa cells was downloaded from NCBI, dbGaP phs000640.v8.p1.  
521 [<https://doi.org/10.1016/j.cell.2014.11.021>] The eigenvector, used to delineate compartments in  
522 Hi-C data at coarse resolution, was calculated as the first principal component of the Pearson's  
523 matrix using Juicer (-p KR, BP 50,000). UCSC liftover was used to convert hg19 to hg38  
524 genome coordinates. Fragile sites mapping coordinates were downloaded from HumCFS: a  
525 database of Human chromosomal fragile sites.  
526 <https://webs.iitd.edu.in/raghava/humcfs/download.html>.

### 527 **RT scores for FANCM and GFP-DONSON enriched genomic windows**

528 The genome was divided into 50 Kb windows and the mean RT score for each window was  
529 calculated. The genomic regions enriched in FANCM and GFP-DONSON were selected as those  
530 50 Kb windows in each ChIP with a [ log<sub>2</sub>(ChIP/Input) > 0]. Their corresponding RT scores were  
531 determined, and their distribution of RT scores mapped as violin plots. The box plot inside the  
532 violins represent the median and the interquartile range. Randomly selected genomic regions, with  
533 number and size of the genomic windows matching each sample, were used as controls. All of the  
534 randomized samples have equivalent distributions. In the case of the eigenvector, we used 50 Kb  
535 genomic regions with a value > 0 for the A compartment, and < 0 for the B compartment. As  
536 expected, the distribution of RT scores is heavily biased towards early replication for the A  
537 compartment, and late replication in the B compartment.

538 **Chip-seq coverage of RT quantiles**

539 The genome was divided into 50 Kb windows and the mean RT score for each window was  
540 calculated. The coverage of each ChIP BAM file per genomic window was computed and the  
541 counts converted to TPM (tags per million). The RT quantiles were calculated (n=25). The chip-  
542 seq coverage was displayed in TPM for each of the 25 RT quantiles ordered from Late to Early.

543 **Chip-seq coverage of Hi-C eigen vector quantiles**

544 The eigenvector, used to delineate compartments in Hi-C data at coarse resolution, was calculated  
545 as the first principal component of the Pearson's matrix using Juicer (-p KR, BP 50,000). Chip-seq  
546 coverage of eigenvector quantiles was calculated as follows: the genome was divided into 50 Kb  
547 windows and the mean eigen vector score for each window calculated. We then computed the  
548 coverage of each Chip-seq BAM file for each genomic window, converted counts to TPM (tags  
549 per million) and calculated Hi-C compartment eigenvector quantiles (n=25). ChIP-seq coverage  
550 was displayed in TPM for each of the 25 eigen vector quantiles ordered from B to A.

551 **Reporting summary**

552 Further information on research design is available in the Nature Research Reporting Summary  
553 linked to this paper.

554 **Data availability**

555 All datasets for this study are available from the corresponding author on request. Code will be  
556 made available upon request.

557

558 **Acknowledgements**

559 This research was supported, in part, by the Intramural Research Program of the NIH, National  
560 Institute on Aging, United States ([Z01-AG000746-08](#)). GSM and GSS received funding from the  
561 CR-UK Program grant (C17183/A23303) and JJR was supported by the University of  
562 Birmingham. We thank Cuong Nguyen and Tonya Wallace of the NIA Flow Cytometry Unit for  
563 expert support and guidance, Supriyo De and William Wood for DNA sequencing and data  
564 extraction, Dr. Florencia Pratto for data analysis, and Dr. Yie Liu, Dr. Rafael D. Camerini-Otero,  
565 and Dr. Weidong Wang for helpful suggestions and discussions.

566 **Author Contributions**

567 J.Z., R.J., M.A.B., D.P., M.M.S designed and performed experiments, analyzed data, and prepared  
568 figures. G.S.M., J.J. R. constructed cell lines, A.P.J. generated antibody against DONSON, G.S.S.,  
569 supervised and contributed to the writing of the manuscript, J.Z and M.M.S. conceived the study,  
570 designed experiments, analyzed data, J.Z., M.A.B., and M.M.S. wrote the manuscript.

#### 571 **Corresponding author**

572 Michael M. Seidman

#### 573 **Declaration of Interests**

574 The authors declare no competing interests.

575

#### 576 **References**

- 577 1. Bai,L. *et al.* Architecture of the *Saccharomyces cerevisiae* Replisome. *Adv. Exp. Med. Biol.*  
578 1042, 207-228 (2017).
- 579 2. Mayle,R. *et al.* Mcm10 has potent strand-annealing activity and limits translocase-mediated  
580 fork regression. *Proc. Natl. Acad. Sci. U. S. A* 116, 798-803 (2019).
- 581 3. Yeeles,J.T.P., Janska,A., Early,A., & Diffley,J.F.X. How the Eukaryotic Replisome Achieves  
582 Rapid and Efficient DNA Replication. *Mol. Cell* 65, 105-116 (2017).
- 583 4. Bochman,M.L. & Schwacha,A. The Mcm2-7 complex has in vitro helicase activity. *Mol. Cell*  
584 31, 287-293 (2008).
- 585 5. Costa,A. *et al.* The structural basis for MCM2-7 helicase activation by GINS and Cdc45. *Nat.*  
586 *Struct. Mol. Biol.* 18, 471-477 (2011).
- 587 6. Zhai,Y. & Tye,B.K. Structure of the MCM2-7 Double Hexamer and Its Implications for the  
588 Mechanistic Functions of the Mcm2-7 Complex. *Adv. Exp. Med. Biol.* 1042, 189-205 (2017).
- 589 7. Lewis,J.S. *et al.* Tunability of DNA Polymerase Stability during Eukaryotic DNA  
590 Replication. *Mol. Cell* 77, 17-25 (2020).
- 591 8. Kliszczak,A.E., Rainey,M.D., Harhen,B., Boisvert,F.M., & Santocanale,C. DNA mediated  
592 chromatin pull-down for the study of chromatin replication. *Sci. Rep.* 1, 95 (2011).

- 593 9. Sirbu,B.M. *et al.* Analysis of protein dynamics at active, stalled, and collapsed replication  
594 forks. *Genes Dev.* 25, 1320-1327 (2011).
- 595 10. Lopez-Contreras,A.J. *et al.* A proteomic characterization of factors enriched at nascent DNA  
596 molecules. *Cell Rep.* 3, 1105-1116 (2013).
- 597 11. Alabert,C. *et al.* Nascent chromatin capture proteomics determines chromatin dynamics  
598 during DNA replication and identifies unknown fork components. *Nat. Cell Biol.* 16, 281-  
599 293 (2014).
- 600 12. Wessel,S.R., Mohni,K.N., Luzwick,J.W., Dungrawala,H., & Cortez,D. Functional Analysis  
601 of the Replication Fork Proteome Identifies BET Proteins as PCNA Regulators. *Cell Rep.* 28,  
602 3497-3509 (2019).
- 603 13. Serizay,J. & Ahringer,J. Genome organization at different scales: nature, formation and  
604 function. *Curr. Opin. Cell Biol.* 52, 145-153 (2018).
- 605 14. Dileep,V., Rivera-Mulia,J.C., Sima,J., & Gilbert,D.M. Large-Scale Chromatin Structure-  
606 Function Relationships during the Cell Cycle and Development: Insights from Replication  
607 Timing. *Cold Spring Harb. Symp. Quant. Biol.* 80, 53-63 (2015).
- 608 15. Marchal,C., Sima,J., & Gilbert,D.M. Control of DNA replication timing in the 3D genome.  
609 *Nat. Rev. Mol. Cell Biol.* 20, 721-737 (2019).
- 610 16. Cortez,D., Glick,G., & Elledge,S.J. Minichromosome maintenance proteins are direct targets  
611 of the ATM and ATR checkpoint kinases. *Proc. Natl. Acad. Sci. U. S. A* 101, 10078-10083  
612 (2004).
- 613 17. Matsuoka,S. *et al.* ATM and ATR substrate analysis reveals extensive protein networks  
614 responsive to DNA damage. *Science* 316, 1160-1166 (2007).
- 615 18. Li,Z. & Xu,X. Post-Translational Modifications of the Mini-Chromosome Maintenance  
616 Proteins in DNA Replication. *Genes* 10, pii: E331. doi: 10.3390/genes10050331 (2019).

- 617 19. Gadaleta, M.C. & Noguchi, E. Regulation of DNA Replication through Natural Impediments  
618 in the Eukaryotic Genome. *Genes* 8, pii. E98. doi: 10.3390/genes8030098 (2017).
- 619 20. Sirbu, B.M. *et al.* Identification of proteins at active, stalled, and collapsed replication forks  
620 using isolation of proteins on nascent DNA (iPOND) coupled with mass spectrometry. *J.*  
621 *Biol. Chem.* 288, 31458-31467 (2013).
- 622 21. Lossaint, G. *et al.* FANCD2 binds MCM proteins and controls replisome function upon  
623 activation of S phase checkpoint signaling. *Mol. Cell* 51, 678-690 (2013).
- 624 22. Rickman, K. & Smogorzewska, A. Advances in understanding DNA processing and  
625 protection at stalled replication forks. *J. Cell Biol.* 218, 1096-1107 (2019).
- 626 23. Marmur, J. & Grossman, L. Ultraviolet light induced linking of deoxyribonucleic acid strands  
627 and its reversal by photoreactivating enzyme. *Proc. Natl. Acad. Sci. U. S. A* 47, 778-787  
628 (1961).
- 629 24. Zhang, J. & Walter, J.C. Mechanism and regulation of incisions during DNA interstrand cross-  
630 link repair. *DNA Repair* 19, 135-142 (2014).
- 631 25. Huang, J. *et al.* The DNA translocase FANCM/MHF promotes replication traverse of DNA  
632 interstrand crosslinks. *Mol. Cell* 52, 434-446 (2013).
- 633 26. Mutreja, K. *et al.* ATR-Mediated Global Fork Slowing and Reversal Assist Fork Traverse and  
634 Prevent Chromosomal Breakage at DNA Interstrand Cross-Links. *Cell Rep.* 24, 2629-2642  
635 (2018).
- 636 27. Meetei, A.R. *et al.* A human ortholog of archaeal DNA repair protein Hef is defective in  
637 Fanconi anemia complementation group M. *Nat. Genet.* 37, 958-963 (2005).
- 638
- 639 28. Schwab, R.A., Blackford, A.N., & Niedzwiedz, W. ATR activation and replication fork restart  
640 are defective in FANCM-deficient cells. *EMBO J* 29, 806-818 (2010).
- 641 29. Huang, J. *et al.* Remodeling of Interstrand Crosslink Proximal Replisomes Is Dependent on  
642 ATR, FANCM, and FANCD2. *Cell Rep.* 27, 1794-1808 (2019).

- 643 30. Reynolds,J.J. *et al.* Mutations in DONSON disrupt replication fork stability and cause  
644 microcephalic dwarfism. *Nat. Genet.* 49, 537-549 (2017).
- 645 31. Evrony,G.D. *et al.* Integrated genome and transcriptome sequencing identifies a noncoding  
646 mutation in the genome replication factor DONSON as the cause of microcephaly-  
647 micromelia syndrome. *Genome Res.* 27, 1323-1335 (2017).
- 648 32. Alizadeh,M., Wada,M., Gelfman,C.M., Handa,J.T., & Hjelmeland,L.M. Downregulation of  
649 differentiation specific gene expression by oxidative stress in ARPE-19 cells. *Invest*  
650 *Ophthalmol. Vis. Sci.* 42, 2706-2713 (2001).
- 651 33. Natale,F. *et al.* DNA replication and repair kinetics of Alu, LINE-1 and satellite III genomic  
652 repetitive elements. *Epigenetics. Chromatin.* 11, 61 doi: 10.1186/s13072-018-0226-9 (2018).
- 653 34. Ruthenburg,A.J., Allis,C.D., & Wysocka,J. Methylation of lysine 4 on histone H3: intricacy  
654 of writing and reading a single epigenetic mark. *Mol. Cell* 25, 15-30 (2007).
- 655 35. Janssen,A., Colmenares,S.U., & Karpen,G.H. Heterochromatin: Guardian of the Genome.  
656 *Annu. Rev. Cell Dev. Biol.* 34, 265-288 (2018).
- 657 36. van Steensal,B. & Belmont,A.S. Lamina-Associated Domains: Links with Chromosome  
658 Architecture, Heterochromatin, and Gene Repression. *Cell* 169, 780-791 (2017).
- 659 37. Yuan,Z. *et al.* DNA unwinding mechanism of a eukaryotic replicative CMG helicase. *Nat.*  
660 *Commun.* 11, 688 (2020).
- 661 38. Lieberman-Aiden,E. *et al.* Comprehensive mapping of long-range interactions reveals  
662 folding principles of the human genome. *Science* 326, 289-293 (2009).
- 663 39. Solovei,I., Thanisch,K., & Feodorova,Y. How to rule the nucleus: divide et impera. *Curr.*  
664 *Opin. Cell Biol.* 40, 47-59 (2016).
- 665 40. Dabin,J., Fortuny,A., & Polo,S.E. Epigenome Maintenance in Response to DNA Damage.  
666 *Mol. Cell* 62, 712-727 (2016).

- 667 41. Zeman,M.K. & Cimprich,K.A. Causes and consequences of replication stress. *Nat. Cell Biol.*  
668 16, 2-9 (2014).
- 669 42. Taylor,M.R.G. & Yeeles,J.T.P. The Initial Response of a Eukaryotic Replisome to DNA  
670 Damage. *Mol. Cell* 70, 1067-1080 (2018).
- 671 43. Rowley,M.J. *et al.* Evolutionarily Conserved Principles Predict 3D Chromatin Organization.  
672 *Mol. Cell* 67, 837-852 (2017).
- 673 44. Takata,H. *et al.* Chromatin compaction protects genomic DNA from radiation damage. *PLoS.*  
674 *ONE.* 8, e75622 (2013).
- 675 45. Sollier,J. & Cimprich,K.A. Breaking bad: R-loops and genome integrity. *Trends Cell Biol.*  
676 25, 514-522 (2015).
- 677 46. Maffia,A., Ranise,C., & Sabbioneda,S. From R-Loops to G-Quadruplexes: Emerging New  
678 Threats for the Replication Fork. *Int. J. Mol. Sci.* 21, (2020).
- 679 47. Hamperl,S. & Cimprich,K.A. Conflict Resolution in the Genome: How Transcription and  
680 Replication Make It Work. *Cell* 167, 1455-1467 (2016).
- 681 48. Catucci,I. *et al.* Individuals with FANCM biallelic mutations do not develop Fanconi anemia,  
682 but show risk for breast cancer, chemotherapy toxicity and may display chromosome  
683 fragility. *Genet. Med.* 20, 452-457 (2018).
- 684 49. Bogliolo,M. *et al.* Biallelic truncating FANCM mutations cause early-onset cancer but not  
685 Fanconi anemia. *Genet. Med.* 20, 458-463 (2018).
- 686 50. Nikolov,I. & Taddei,A. Linking replication stress with heterochromatin formation.  
687 *Chromosoma* 125, 523-533 (2016).
- 688 51. Samel,S.A. *et al.* A unique DNA entry gate serves for regulated loading of the eukaryotic  
689 replicative helicase MCM2-7 onto DNA. *Genes Dev.* 28, 1653-1666 (2014).
- 690 52. Sparks,J.L. *et al.* The CMG Helicase Bypasses DNA-Protein Cross-Links to Facilitate Their  
691 Repair. *Cell* 176, 167-181 (2019).



- 692 53. Wasserman, M.R., Schauer, G.D., O'Donnell, M.E., & Liu, S. Replication Fork Activation Is  
693 Enabled by a Single-Stranded DNA Gate in CMG Helicase. *Cell* 178, 600-611 (2019).
- 694 54. Yang, W., Seidman, M.M., Rupp, W.D., & Gao, Y. Replisome structure suggests mechanism  
695 for continuous fork progression and post-replication repair. *DNA Repair* 81, 102658 (2019).
- 696 55. Couch, F.B. *et al.* ATR phosphorylates SMARCAL1 to prevent replication fork collapse.  
697 *Genes Dev.* 27, 1610-1623 (2013).
- 698 56. Vujanovic, M. *et al.* Replication Fork Slowing and Reversal upon DNA Damage Require  
699 PCNA Polyubiquitination and ZRANB3 DNA Translocase Activity. *Mol. Cell* 67, 882-890  
700 (2017).
- 701 57. Yadav, T., Quivy, J.P., & Almouzni, G. Chromatin plasticity: A versatile landscape that  
702 underlies cell fate and identity. *Science* 361, 1332-1336 (2018).
- 703 58. Mendelsohn, A.R. & Larrick, J.W. Stem Cell Depletion by Global Disorganization of the  
704 H3K9me3 Epigenetic Marker in Aging. *Rejuvenation. Res.* 18, 371-375 (2015).
- 705 59. Huang, J. *et al.* Single Molecule Analysis of Laser Localized Interstrand Crosslinks. *Front*  
706 *Genet.* 7, 84 (2016).

707  
708

## 709 **Figure Legends**

### 710 **1. DONSON and FANCM operate in separate pathways to promote replication traverse.**

711 **a.** Schematic of the experimental procedure. HeLa cells were treated with siRNA against  
712 DONSON or FANCM or both. They were exposed to Dig-TMP/UVA and incubated with CldU  
713 and then IdU. Fibers were prepared and the patterns displayed by immunofluorescence against the  
714 analogues and immunoquantum detection (Q-dot 655, in red) for Dig tagged ICLs. Representative  
715 patterns are shown. **b.** Quantitation of pattern distribution from cells treated as indicated. Fibers  
716 with ICL encounters: NT= 417; siDONSON= 432; siFANCM= 417; siDONSON + siFANCM =  
717 385, from 3 independent replicates. **c.** IP immunoblot of chromatin proteins from cells expressing  
718 GFP (panels 1, 2) or GFP-DONSON (panels 3, 4) exposed to UVA (-) or TMP/UVA (+). The  
719 identity of the proteins is indicated on the side. The amounts of PSF1 and CDC45 in the two

720 samples were quantitated. Representative blot (n = 3) **d.** PLA test of the influence of ATR  
721 inhibition on GFP-DONSON interactions with pMCM2S108, MCM2, and MCM5. Number of  
722 nuclei: PLA between GFP-DONSON and pMCM2 in cells treated with UVA= 58, TMP/UVA=  
723 94, TMP/UVA+ATRi= 55; PLA between GFP-DONSON and MCM2 in UVA= 95, TMP/UVA=  
724 89, TMP/UVA+ATRi= 93; PLA between GFP-DONSON and MCM5 in UVA= 88, TMP/UVA=  
725 79, TMP/UVA+ATRi= 73; from 3 biological replicates. **e.** PLA assessing the influence of ATR  
726 inhibition on GFP-DONSON interactions with CDC45 and PSF1. Scored nuclei of PLA between  
727 GFP-DONSON and CDC45 in UVA= 70, TMP/UVA= 71, TMP/UVA+ATRi= 73; Scored nuclei  
728 of PLA between GFP-DONSON and PSF1 in UVA= 71, TMP/UVA= 64, TMP/UVA+ATRi= 77;  
729 from 3 biological replicates. **f.** Influence of ATR inhibition on the PLA between GFP-DONSON  
730 and Dig tagged ICLs. Scored nuclei: Vehicle =72, ATRi = 87, 3 biological replicates. A two-sided  
731 unpaired t-test was used to calculate p- values for replication pattern frequency experiments and  
732 western blotting image analysis. Data are mean  $\pm$  s.d. Mann-Whitney Rank sum test was used to  
733 calculate p-values for PLA experiments. Data are mean  $\pm$  s.e.m. NS, not significant:  $p>0.05$ .

734 **2. DONSON and FANCM are on different replisomes. a.** Scheme of sequential IP against  
735 DONSON and FANCM associated replisomes. HeLa cells expressing GFP-DONSON were  
736 exposed to UVA only or TMP/UVA. Chromatin was prepared and digested with benzonase. This  
737 was followed by IP against PSF1 (to remove “unstressed” replisomes), then IP of the supernatant  
738 against GFP (to remove remaining DONSON associated proteins), and finally IP of the residual  
739 supernatant to capture FANCM bound proteins. **b.** Western blot analysis of sequential IP. **c.** PLA  
740 in cells exposed to UVA only or TMP/UVA shows interactions between GFP-DONSON and  
741 MCM2; and FANCM and MCM2; but not between GFP-DONSON and FANCM. Scored nuclei:  
742 PLA between GFP-D: MCM2, UVA treatment = 174; TMP/UVA =148; PLA between FANCM:  
743 MCM2, UVA = 142; TMP/UVA =145; PLA between GFP-D: FANCM, UVA =135; TMP/UVA  
744 =133. from 3 biological replicates. **d.** Association of replisomes with Dig-tagged ICLs. Chromatin  
745 was prepared from cells exposed to UVA or Dig-TMP/UVA and the DNA reduced to fragments  
746 of < 500 bp by sonication. Sequential IP was performed, and the DNA isolated from each fraction,  
747 dotted onto nitrocellulose and probed with an antibody to the Dig tag. LINE-1 repeat element  
748 served as a loading control. Representative blot (n = 2). **e.** Model summarizing the results of the  
749 sequential IP experiment. Mann-Whitney Rank sum test were used for analysis of PLA  
750 experiments. Data are mean  $\pm$  s.e.m. NS, not significant:  $p>0.05$ .

751 **3. DONSON and FANCM replisomes are active in different stages of S phase. a.**

752 Analysis by sequential PLA of GFP-DONSON: pMCM2S108 complexes and then FANCM:  
753 pMCM2S108, in GFP-DONSON expressing cells exposed to TMP/UVA. After the first PLA the  
754 cells were photographed (first column of images) and the antibodies and PLA product stripped  
755 (second column). The second PLA was performed and the cells re-imaged (third column). The  
756 fourth column shows a merge of both images after image registration in the xyz planes using the  
757 DAPI signal. Shown are examples of cells with strong signals from both first and second PLA, or  
758 strong signals from the first but infrequent from the second, or weak from the first and strong from  
759 the second. The signals from the two PLA do not colocalize. **b**, Early and late S phase fractions  
760 were isolated from sorted cells. The PCNA staining pattern from each fraction. **c**. GFP-D:  
761 pMCM2S108 PLA in sorted early and late S phase cells. Scored nuclei: GFP-D: pMCM2S108 of  
762 early S phase= 62, late S phase= 60, from 3 biological replicates. **d**. FANCM: pMCM2S108 PLA  
763 in sorted early and late S phase cells. Scored nuclei: FANCM: pMCM2S108 of early S phase= 63,  
764 late S phase= 64, from 3 biological replicates. **e, f**. Influence of DONSON and FANCM on patterns  
765 of replication encounters with ICLs in early and late S phase cells. Cells were treated with siRNA  
766 against DONSON or FANCM, exposed to Dig-TMP/UVA and pulsed with nucleoside analogues  
767 as in Fig 1a. Cells were sorted, and fiber patterns from early and late S phase analyzed. Mann-  
768 Whitney Rank sum test were used for analysis of PLA experiments. Data are mean  $\pm$  s.e.m. NS,  
769 not significant:  $p > 0.05$ .

770 **4. Relationship of DONSON and FANCM to replication timing and chromatin domain.**

771 Cells were treated with either UVA or TMP/UVA. **a**. Sequential IP demonstrates association of  
772 early replicating Alu sequences with DONSON and late replicating Satellite 3 sequences with  
773 FANCM. LINE-1 elements replicate throughout S phase and are found in all fractions. **b**.  
774 DONSON interaction with the H3K4me3 euchromatin mark is more frequent in early S phase cells  
775 than in late S phase, while there is little interaction with the H3K9me3 heterochromatin mark in  
776 either stage. Sorted early and late S phase cells were examined by PLA. Scored nuclei: PLA  
777 between GFP-D: H3K4me3 of early S phase= 67, late S phase= 64, PLA between GFP-D:  
778 H3K9me3 of early S phase= 70, late S phase= 85, from 3 biological replicates. **c**. FANCM  
779 interaction with H3K9 me3 heterochromatin mark is biased towards late S phase, while there is  
780 low interaction frequency with H3K4me3 in either stage. Scored nuclei: PLA between FANCM:  
781 H3K4me3 of early S phase= 64, late S phase= 66, PLA between FANCM: H3K9me3 of early S

782 phase= 67, late S phase= 77, from 3 biological replicates. **d.** Sequential IP demonstrates greater  
783 association of DONSON with H3K4me3 than H3K9me3 and greater association of FANCM with  
784 H3K9me3 than H3K4me3. Mann-Whitney Rank sum test were used for analysis of PLA  
785 experiments. Data are mean  $\pm$  s.e.m. NS, not significant:  $p>0.05$ .

## 786 **5. Interactions of DONSON and FANCM with replisomes and chromatin in non-treated**

787 **cells. a.** DONSON associates with some, but not all, replisomes in untreated cells. Chromatin was  
788 prepared from untreated GFP-DONSON-HeLa cells and sequential IP performed, first against  
789 GFP-DONSON, and then against the GINS protein PSF1 from the residual supernatant. **b.** PLA of  
790 GFP-DONSON and PSF1 demonstrates DONSON associated replisomes are more frequent in  
791 early S phase than in late S phase in NT cells. Scored nuclei: PLA between GFP-D: PSF1 early S  
792 phase= 82, late S phase= 81, from 3 biological replicates. **c.** PLA between FANCM and MCM2  
793 demonstrates low level of FANCM associated replisomes in late S phase in non-treated cells.  
794 Scored nuclei: PLA between FANCM: MCM2 of early S phase= 73, late S phase= 75, from 3  
795 biological replicates. **d.** IP of FANCM demonstrates low level interaction with replisome protein  
796 MCM2. **e.** PLA between GFP-DONSON and H3K4me3 or H3K9me3. Scored nuclei of GFP-  
797 DONSON and H3K4me3 in early S phase= 79, late S phase= 78; Scored nuclei of GFP-DONSON  
798 and H3K9me3 in early S phase= 77, late S phase= 82, from 3 biological replicates. **f.** PLA between  
799 FANCM and H3K4me3 or H3K9me3. Scored nuclei of FANCM and H3K4me3 in early S phase=  
800 64, late S phase= 65; Scored nuclei of FANCM and H3K9me3 in early S phase= 68, late S phase=  
801 65, from 3 biological replicates. Mann-Whitney Rank sum test was used to calculate p-values for  
802 PLA experiments. Data are mean  $\pm$  s.e.m. NS: not significant ( $p>0.05$ ).

## 803 **6. ChIP-Seq Analysis of genome-wide distribution of FANCM and GFP-DONSON a.**

804 Representative profile from chromosome 1, comparing RT ( $RT = \log_2(\text{Early/Late})$ ) in HeLa cells,  
805 A/B compartments as defined by the eigenvector calculated from Hi-C data from HeLa cells, and  
806 FANCM and GFP-DONSON distribution (enrichment =  $\log_2(\text{ChIP/input})$ ) in HeLa cells stably  
807 expressing GFP-DONSON. Shadowed in red are some examples of late replicating regions  
808 aligning with FANCM enriched genomic regions. In blue are highlighted some early replicating  
809 regions showing correspondence with GFP-DONSON enriched regions. In the RT profile, positive  
810 and negative values correspond to early and late replication respectively. In the eigenvector profile,  
811 they correspond to the A and B compartments. Regions containing fragile sites are marked by red  
812 bars above the profiles. **b.** Violin plot displaying the distribution of replication timing of 50 Kb

813 genomic windows enriched in FANCM or GFP-DONSON ChIP ( $\log_2[\text{ChIP}/\text{Input}] > 0$ ) and the  
814 A and B Hi-C compartments (eigenvector  $>0$ ,  $<0$ , respectively), each compared to a matching  
815 number of randomly selected genomic windows of the same size. **c.** Coverage of H3K9me3,  
816 H3K4me3, FANCM and GFP-DONSON of 50 Kb genomic windows within 25 replication timing  
817 quantiles, going from late to early replicating regions, in HeLa cells expressing GFP-DONSON. **d.**  
818 Coverage of H3K9me3, H3K4me3, FANCM and GFP-DONSON of 50 kb genomic windows  
819 within 25 eigenvector quantiles, going from B to A Hi-C compartments in HeLa cells expressing  
820 GFP-DONSON.

**Figure 1**

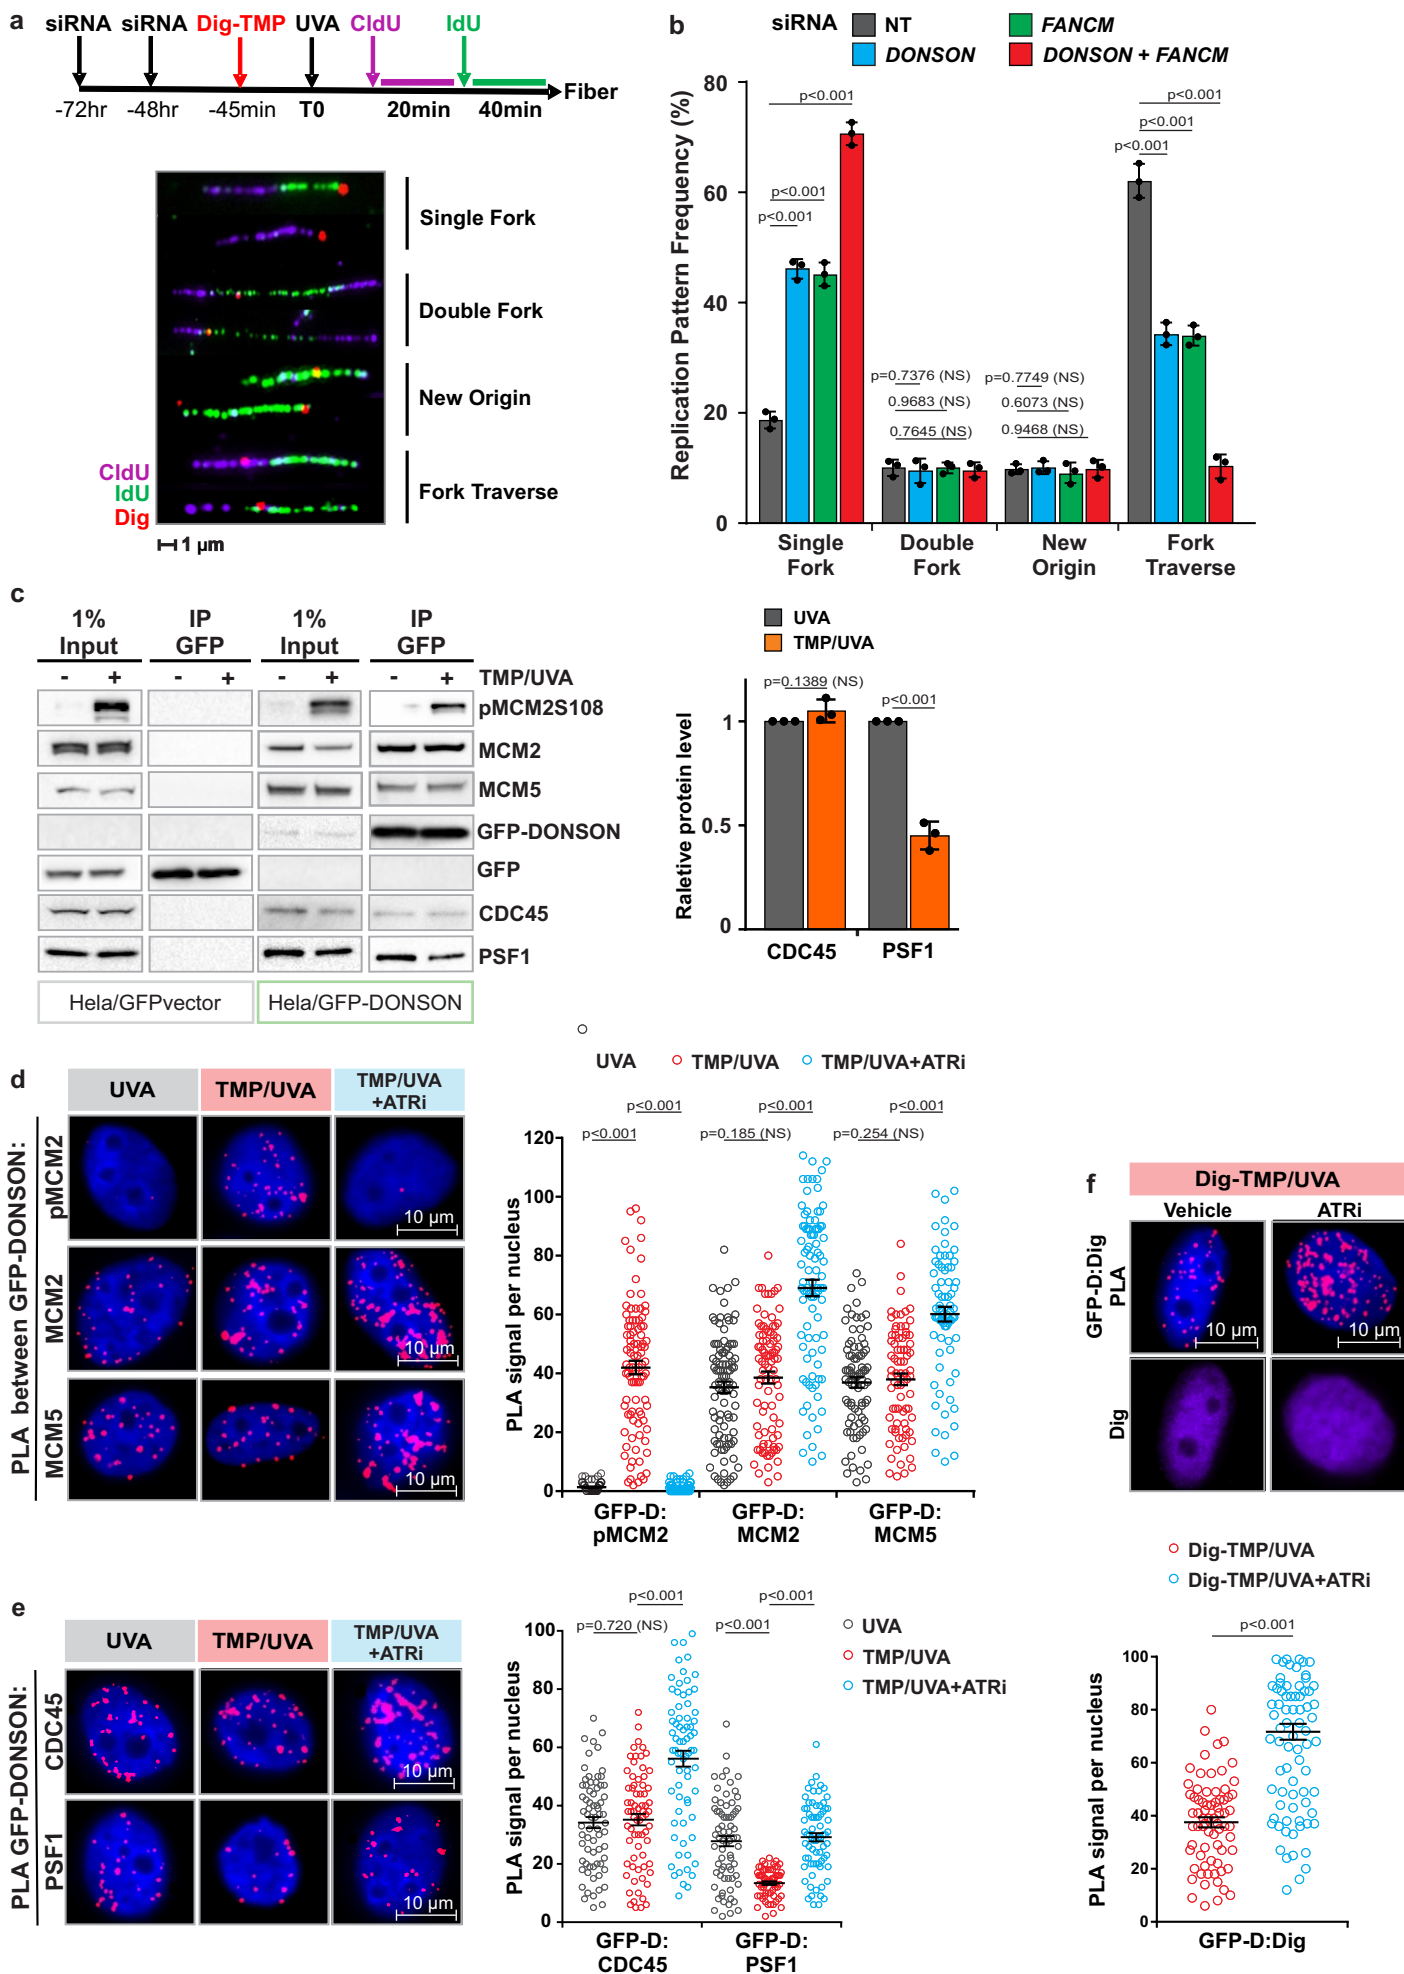

**Figure 2**

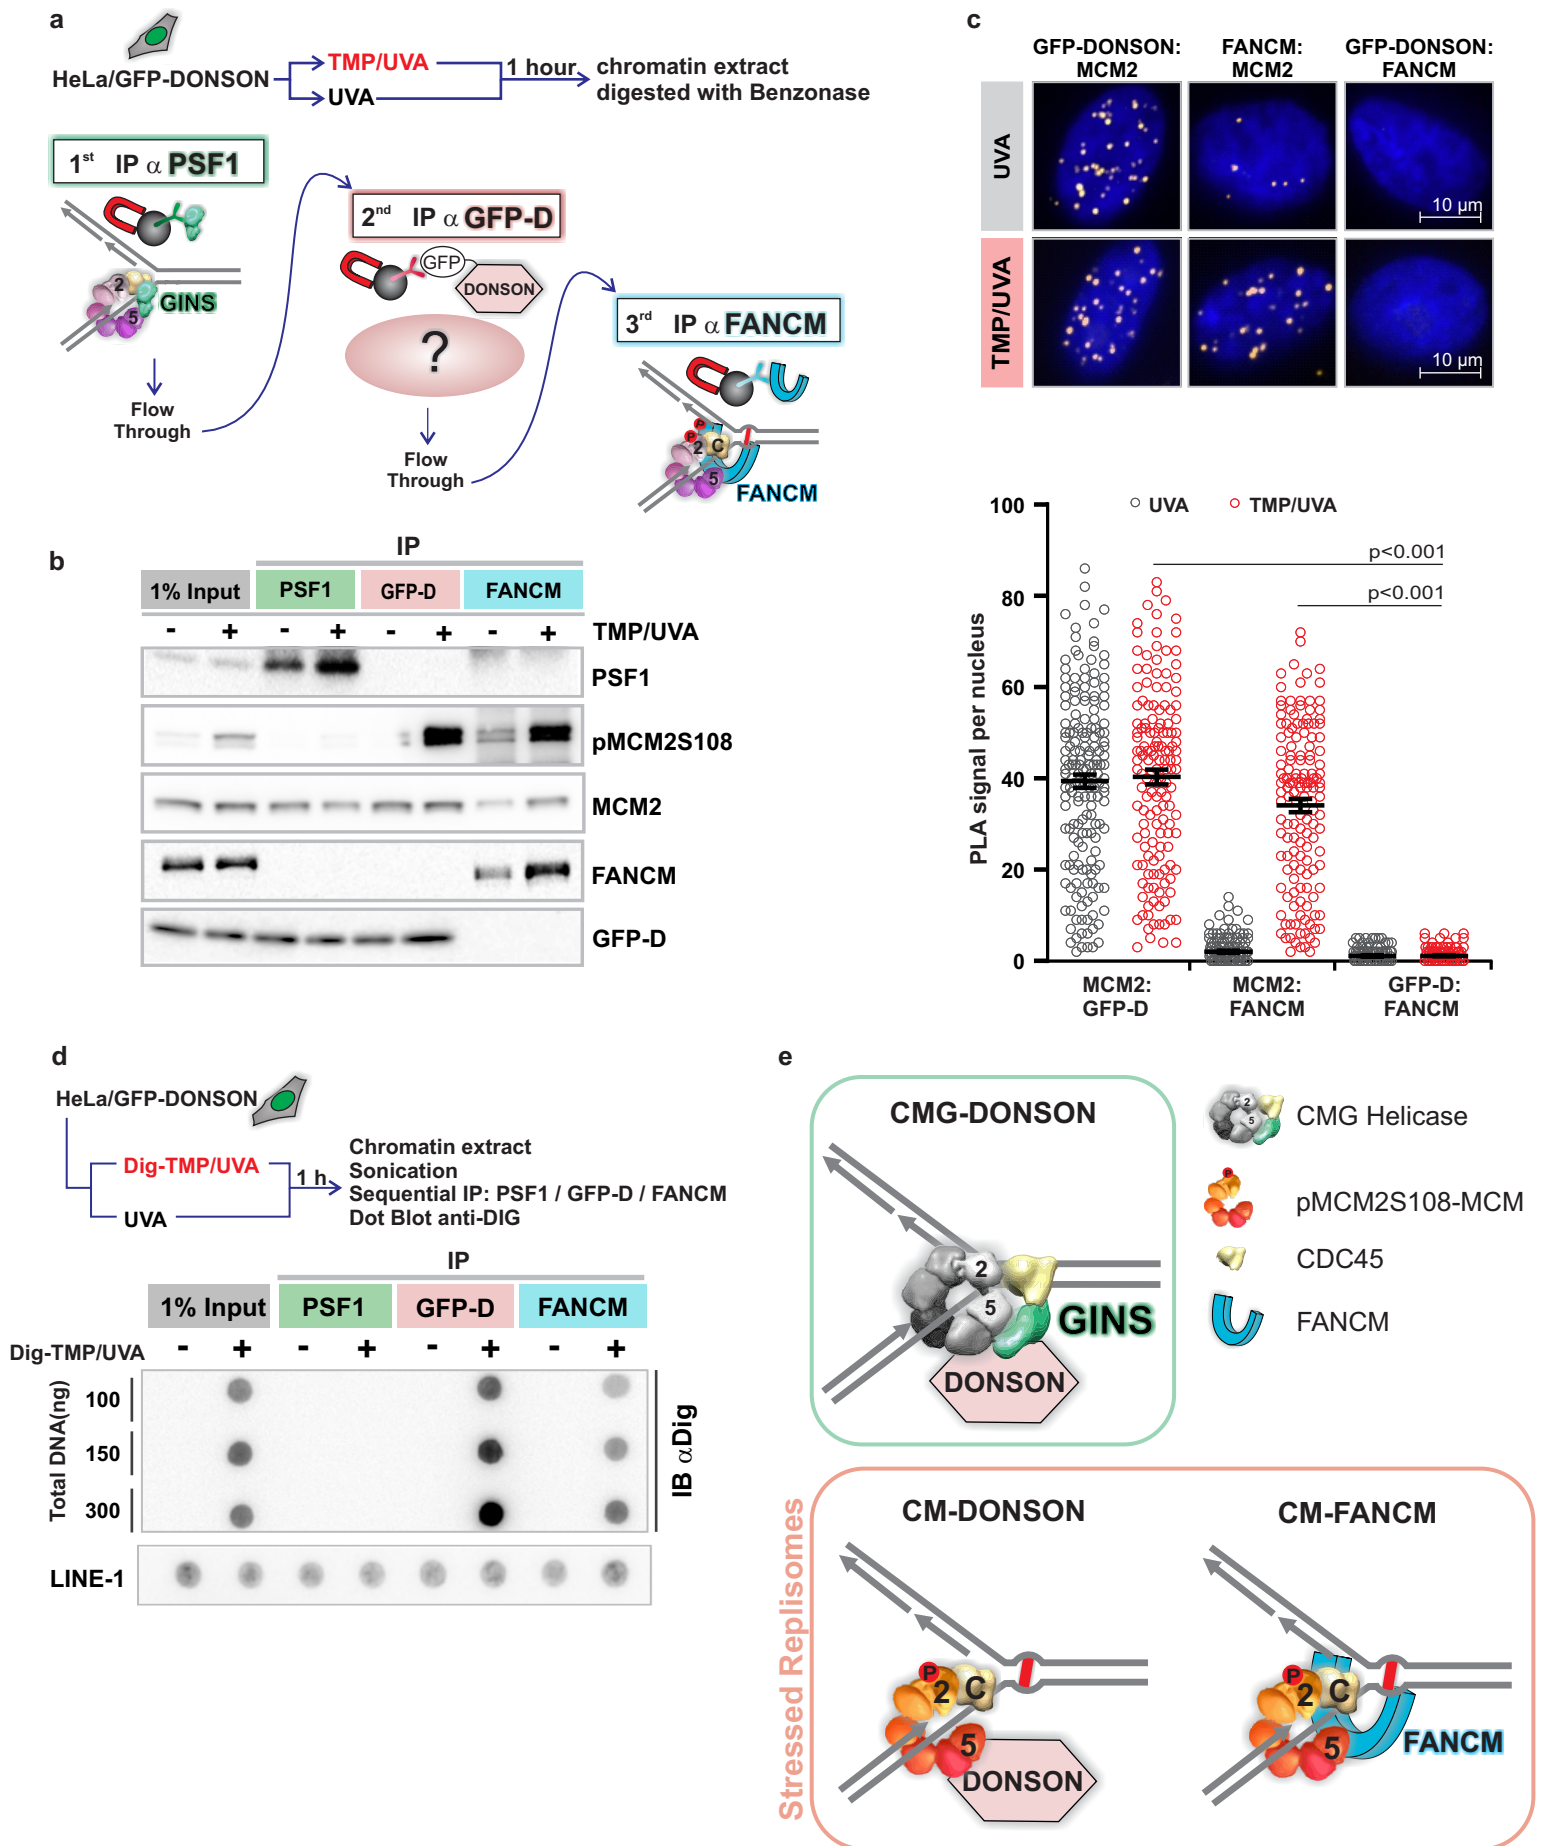

**Figure 3**

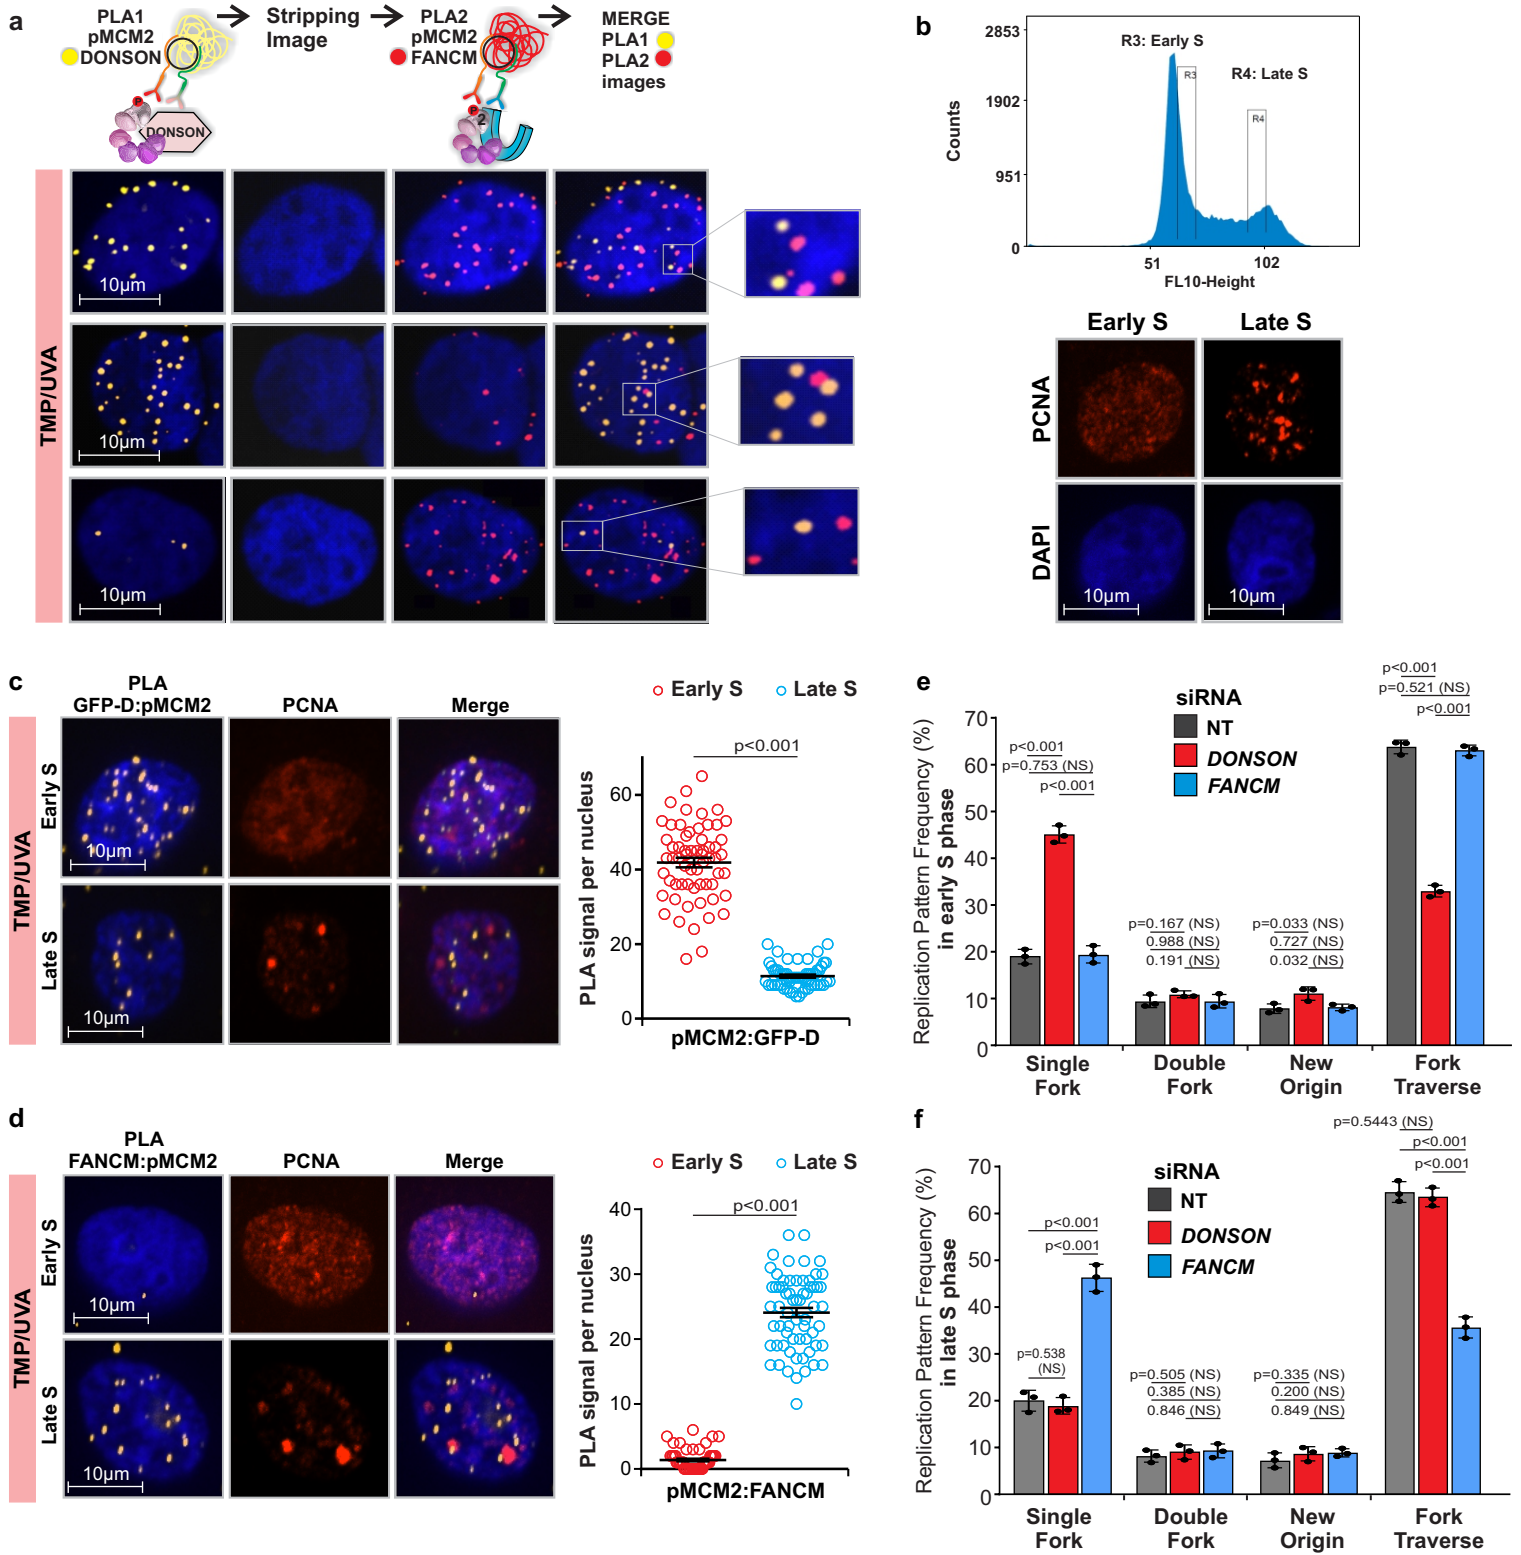



**Figure 4**

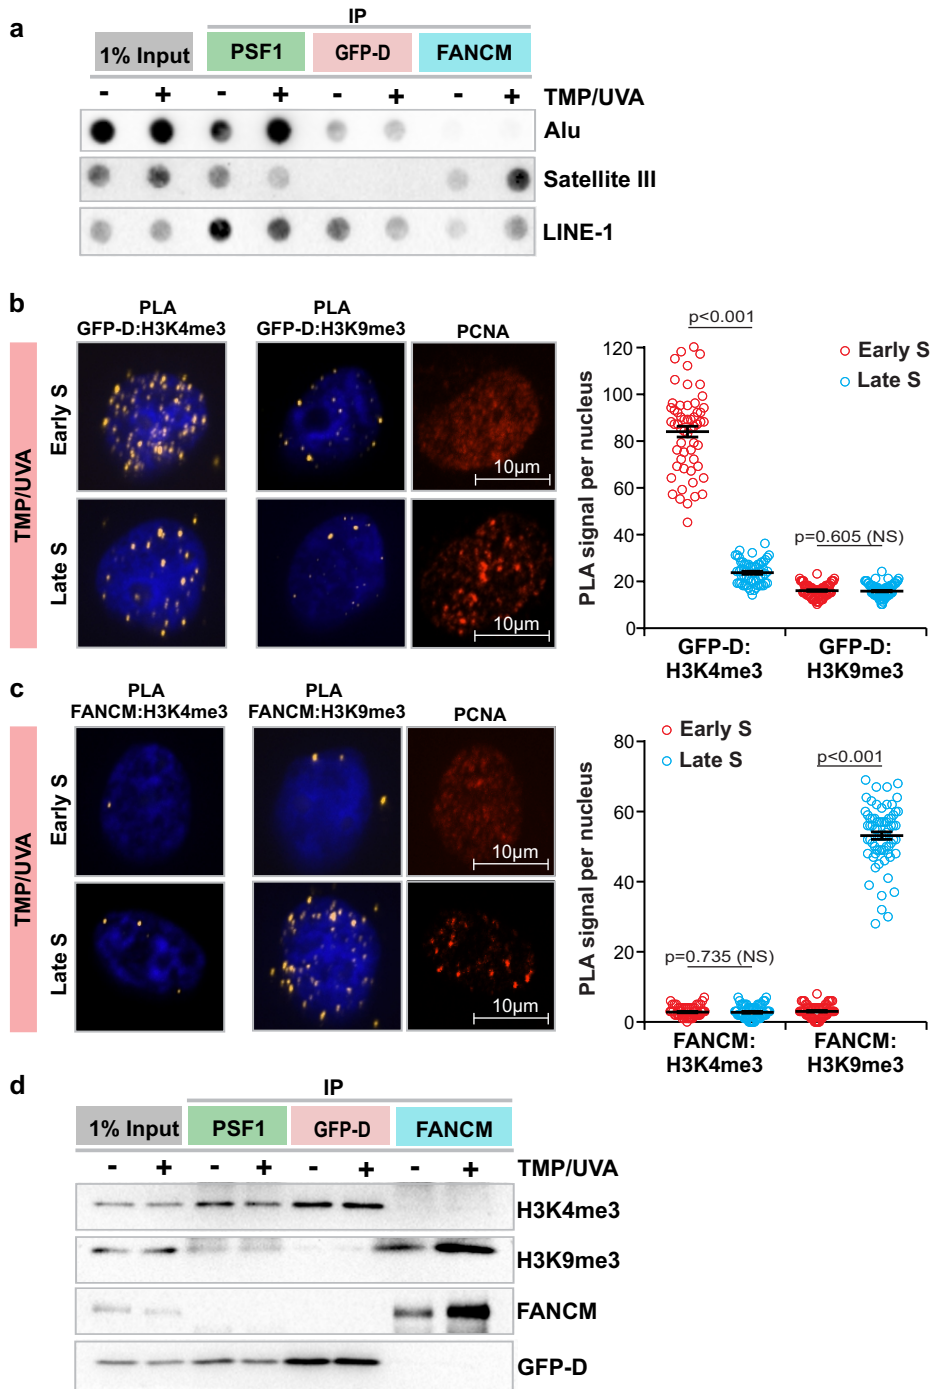

**Figure 5**

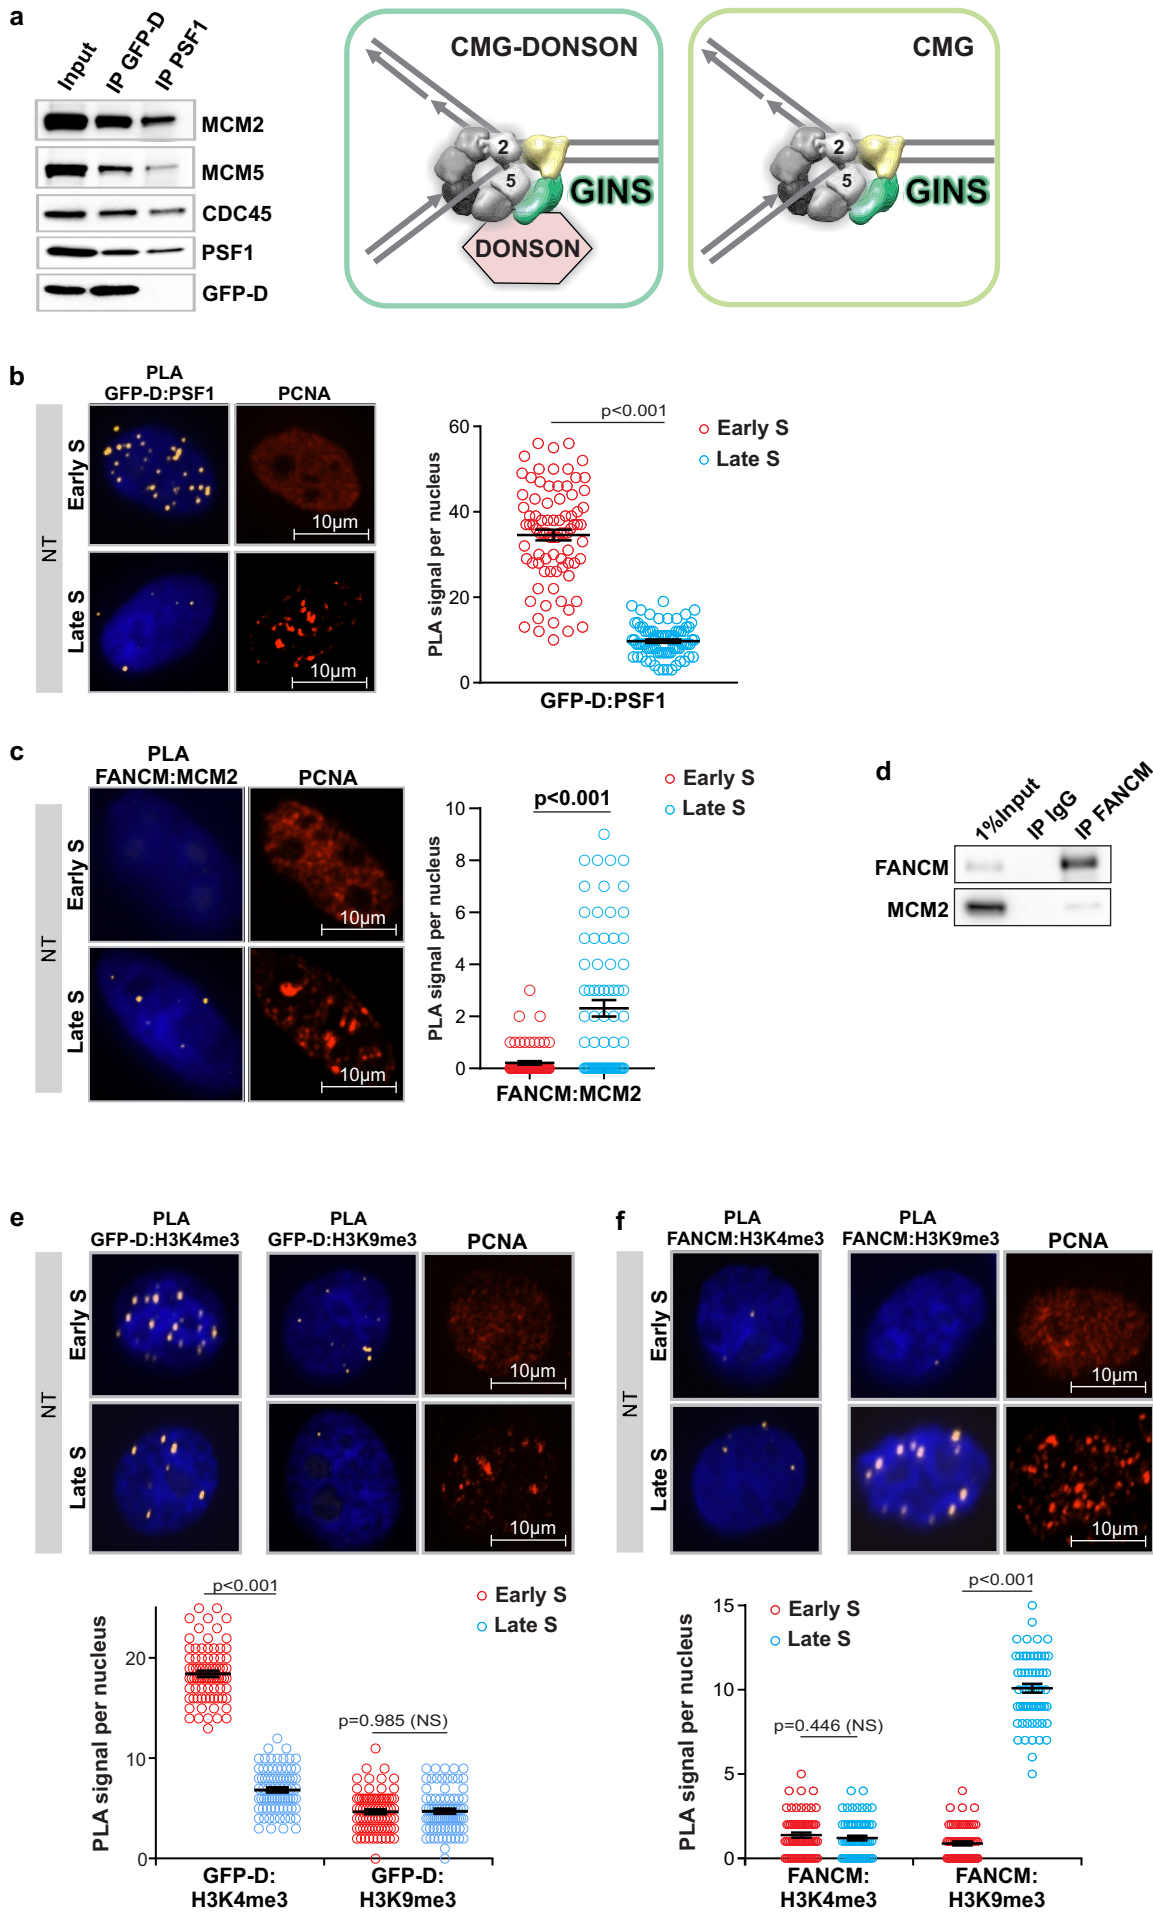

**Figure 6**

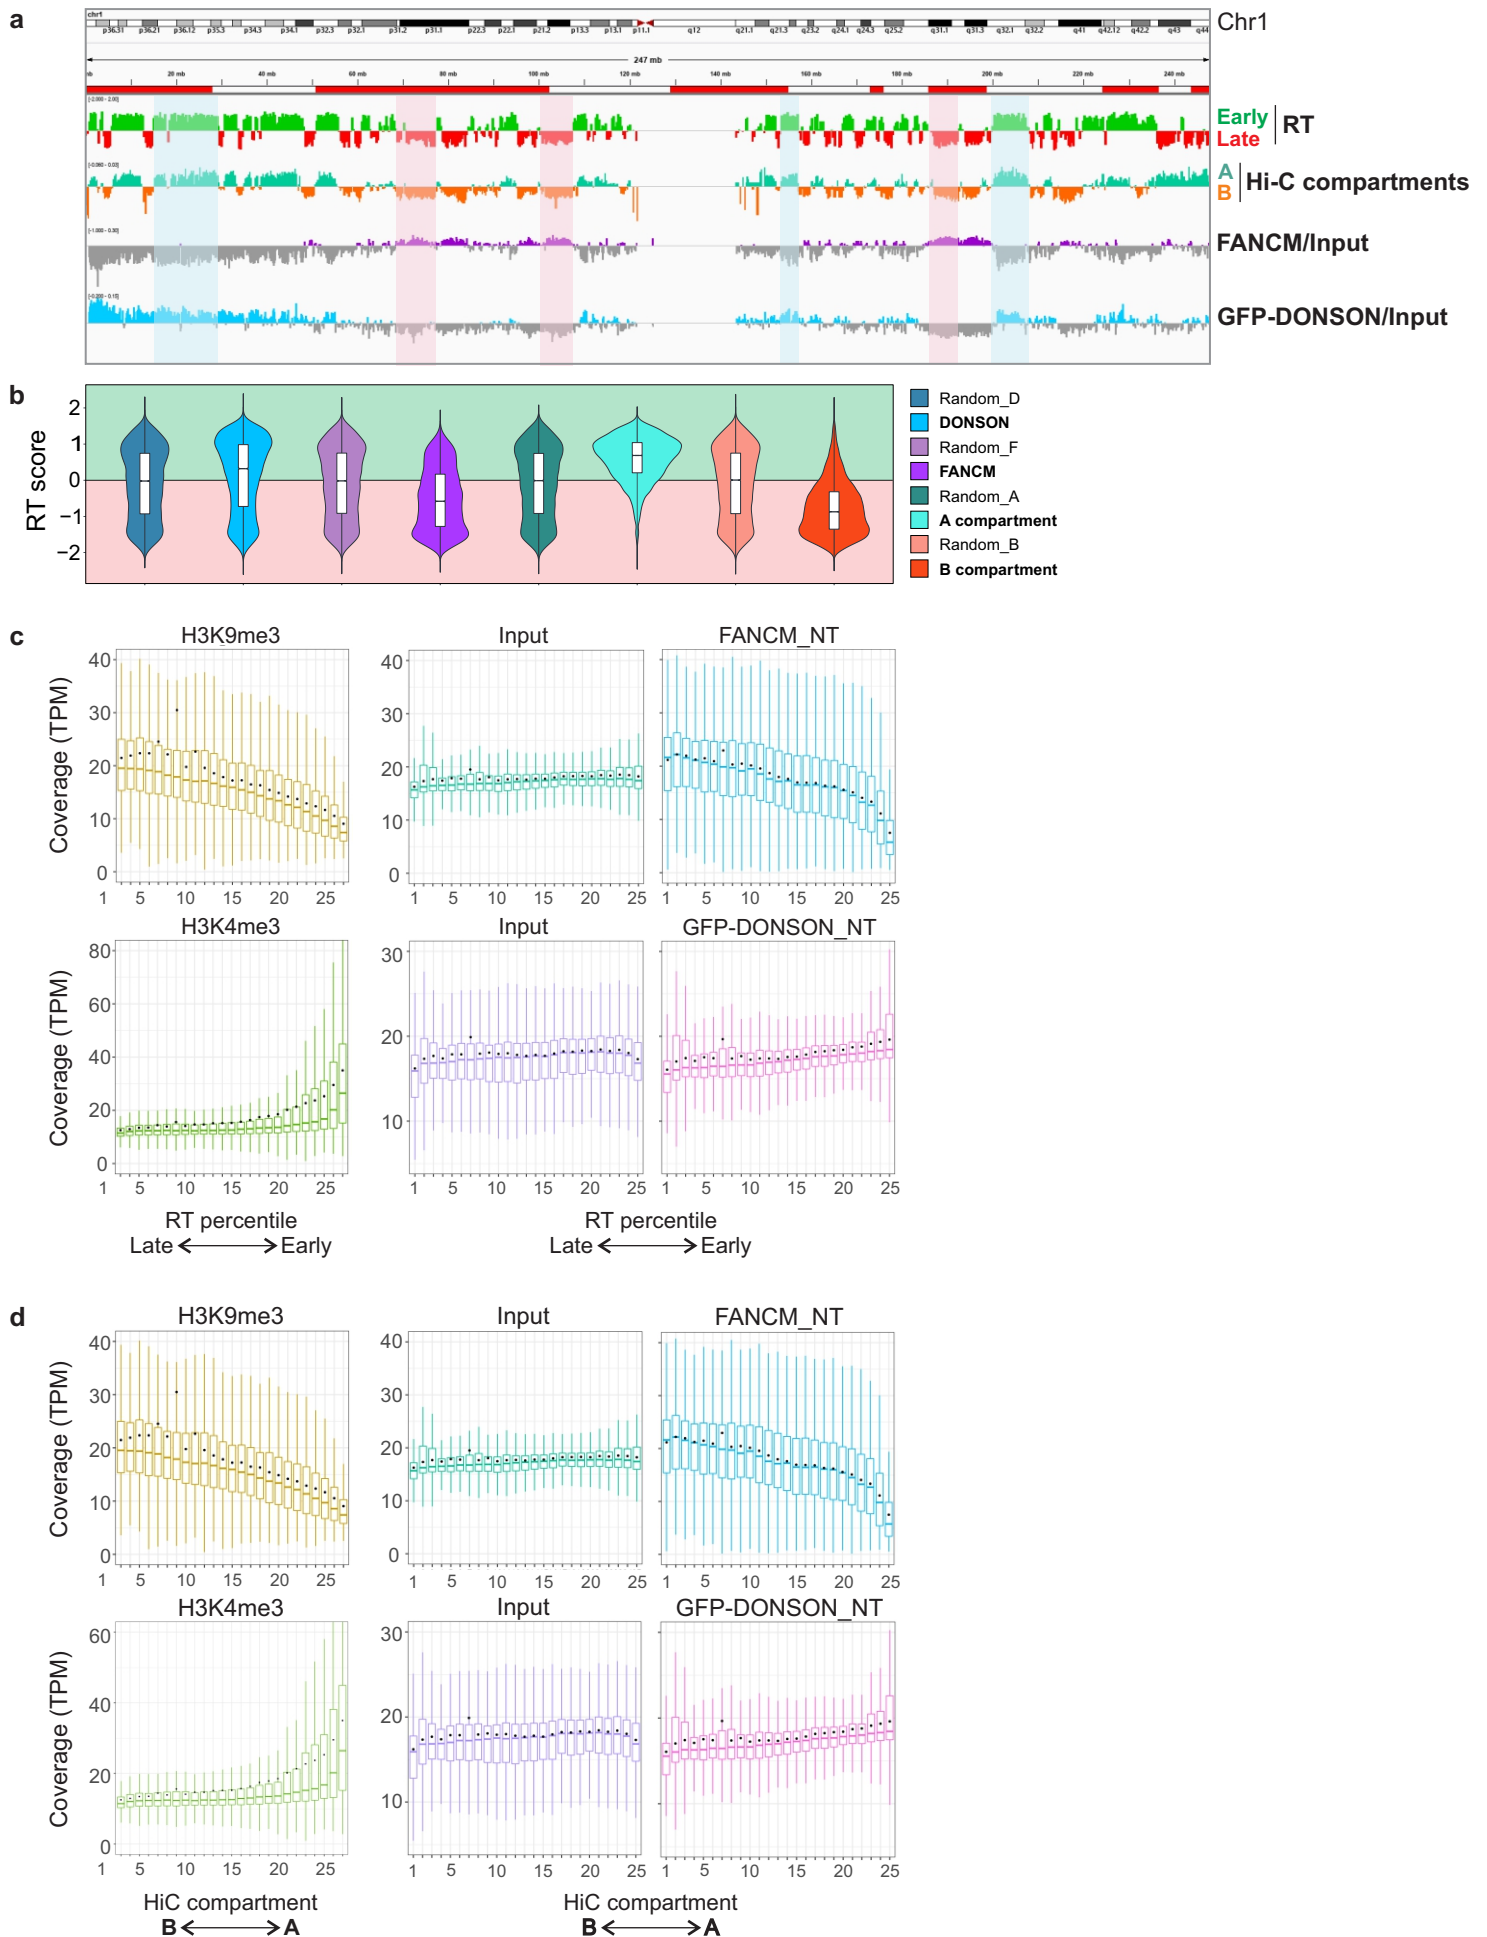

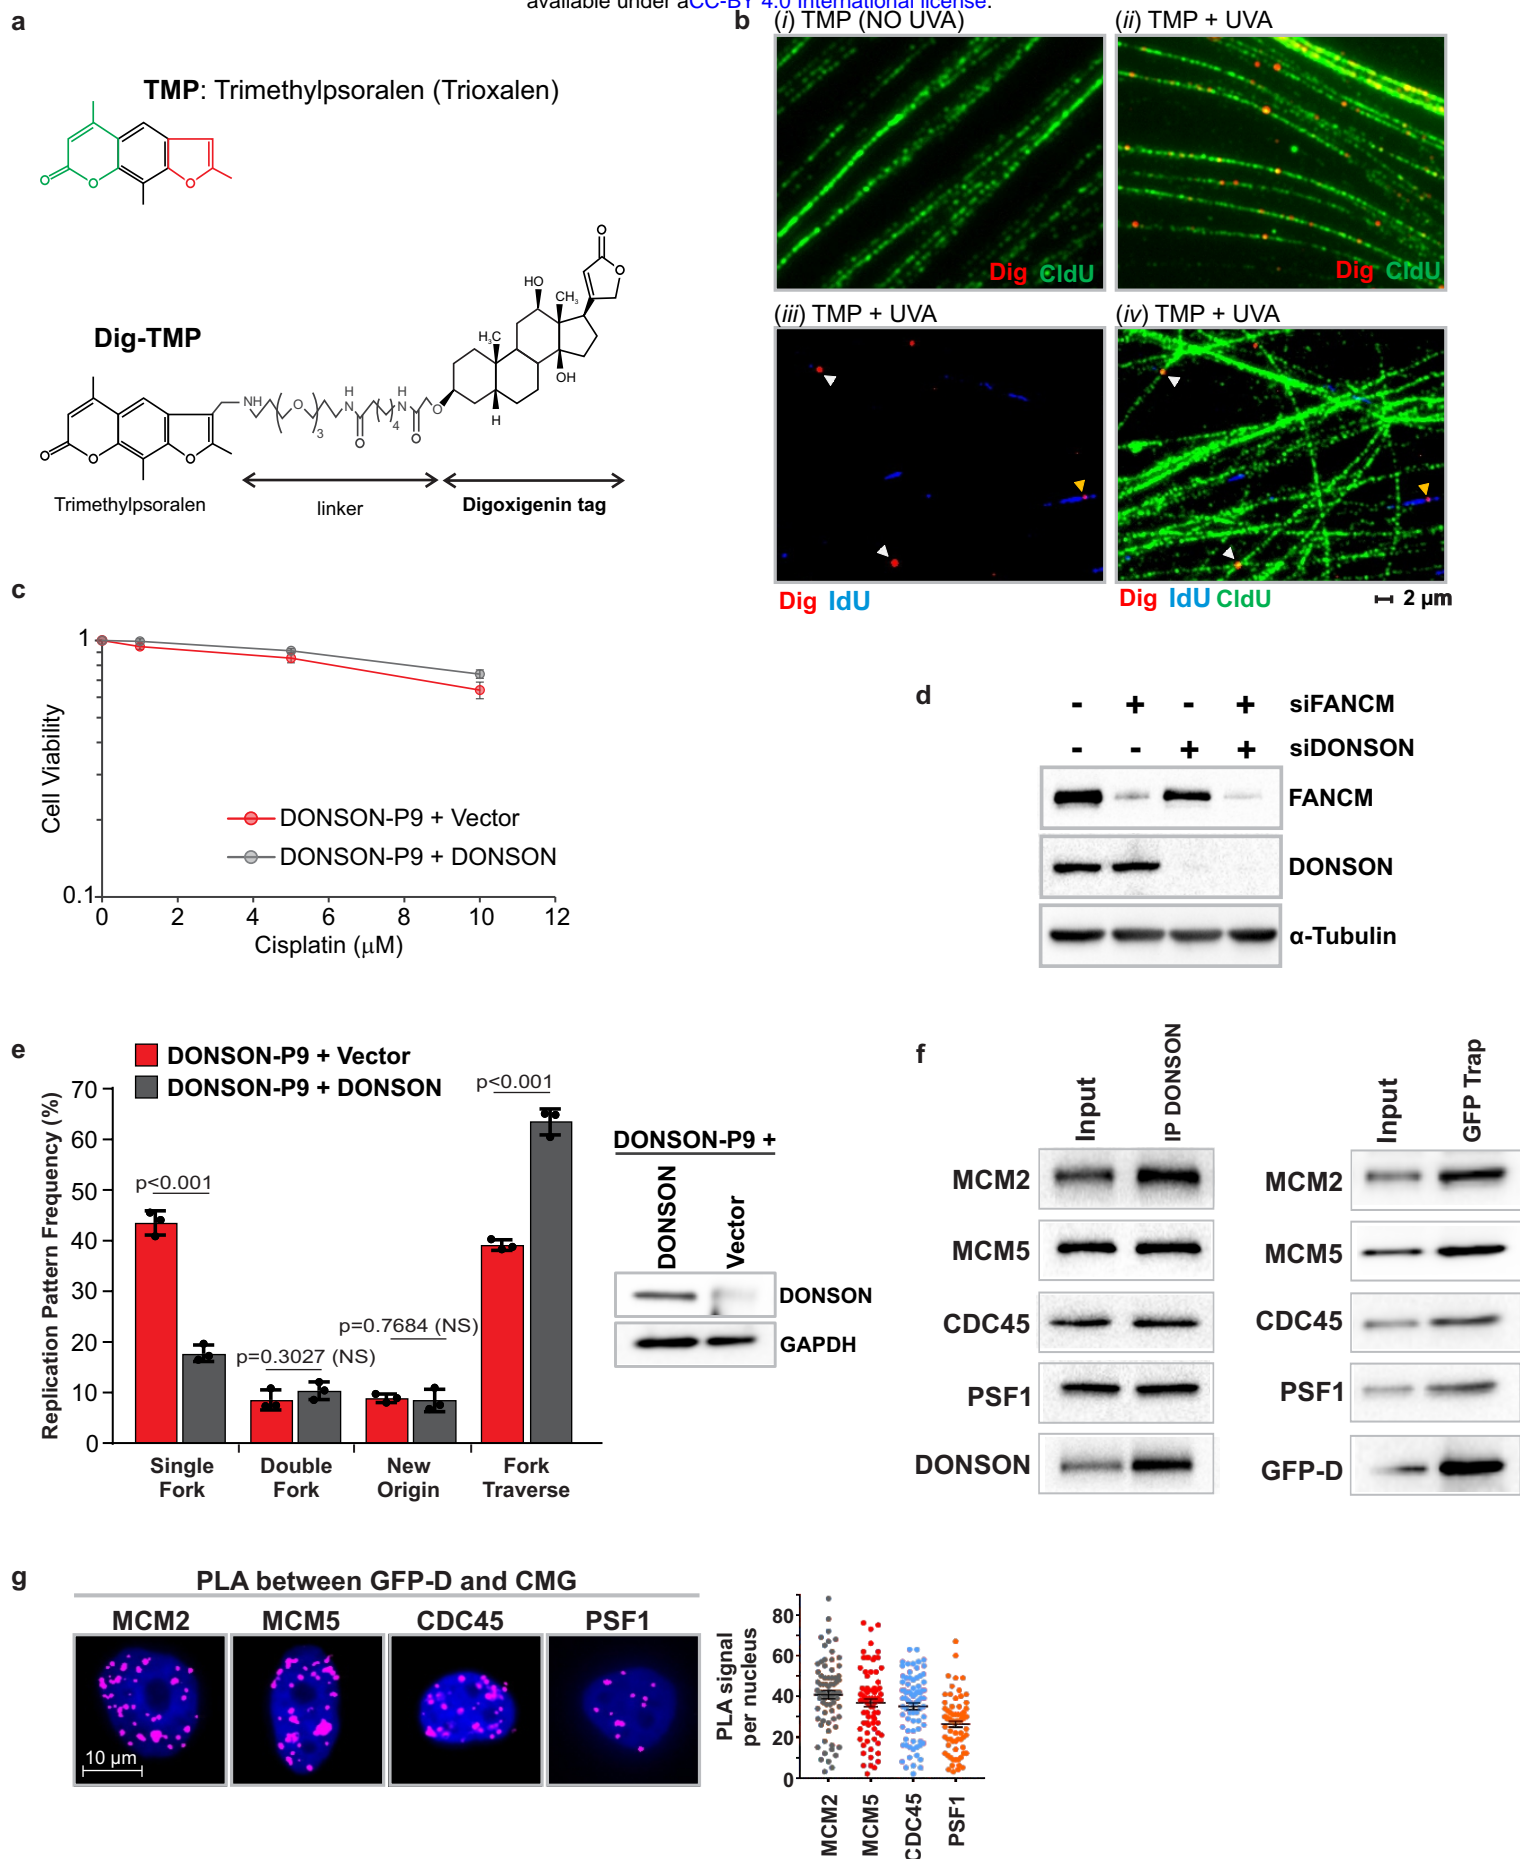

**Supplementary Figure 1: DONSON contributes to replication traverse of ICLs.** **a.** Structure of Digoxigenin-tagged trimethylpsoralen. **b.** Fibers from cells exposed to Dig-TMP/UVA. **i.** Cells were incubated with CldU 24 hrs, then with Dig-TMP. The UVA

exposure, required for crosslinking, was omitted. Fibers were displayed by immunofluorescence (green), and a primary antibody against Dig and a secondary tagged with Q-dot 655 (red). The absence of Q-dot signals reflects the absence of covalently bound Dig tagged ICLs. **ii.** Cells were incubated with 20  $\mu$ M Dig/TMP (a higher concentration than in replication experiments) and exposed to UVA. Note the presence of numerous ICLs on the fibers. **iii.** Cells were incubated with CldU for 24 hrs, treated with 6  $\mu$ M Dig-TMP/UVA, then incubated with IdU for 30 minutes. The IdU and Dig signals are shown, and an encounter with an ICL denoted (yellow arrow). Dig signals (white arrows) not associated with an IdU tract. **iv.** Display of CldU and IdU and Dig in the field shown in **iii.** Dig-TMP signals are on fibers labeled by CldU, although they may not be associated with an IdU tract (yellow arrow). **c.** DONSON does not contribute to survival of cells exposed to Cisplatin. Patient derived cells DONSON-P9 were complemented with either wild type DONSON or vector only. **d.** Knockdown efficiency of siRNA against FANCM, DONSON, or FANCM/DONSON in HeLa cells. **e.** Single fork stalling at ICLs is increased in patient derived cells DONSON-P9. The replication traverse assay was performed in patient derived cells complemented with the vector alone or wild type DONSON. **f.** Immunoprecipitation of either endogenous DONSON or GFP-DONSON demonstrates association with replisome proteins. **g.** The proximity of GFP-DONSON and replisome proteins demonstrated by PLA. Scored nuclei: GFP-DONSON and MCM2= 76, GFP-DONSON and MCM5= 79, GFP-DONSON and CDC45= 80, GFP-DONSON and PSF1= 76, from 3 biological replicates. A two-sided unpaired t-test was used to calculate p-values for replication pattern frequency experiments. Data are mean  $\pm$  s.d. Mann-Whitney Rank sum test was used to calculate p-values for PLA experiments. Data are mean  $\pm$  s.e.m. NS: not significant ( $p > 0.05$ ).

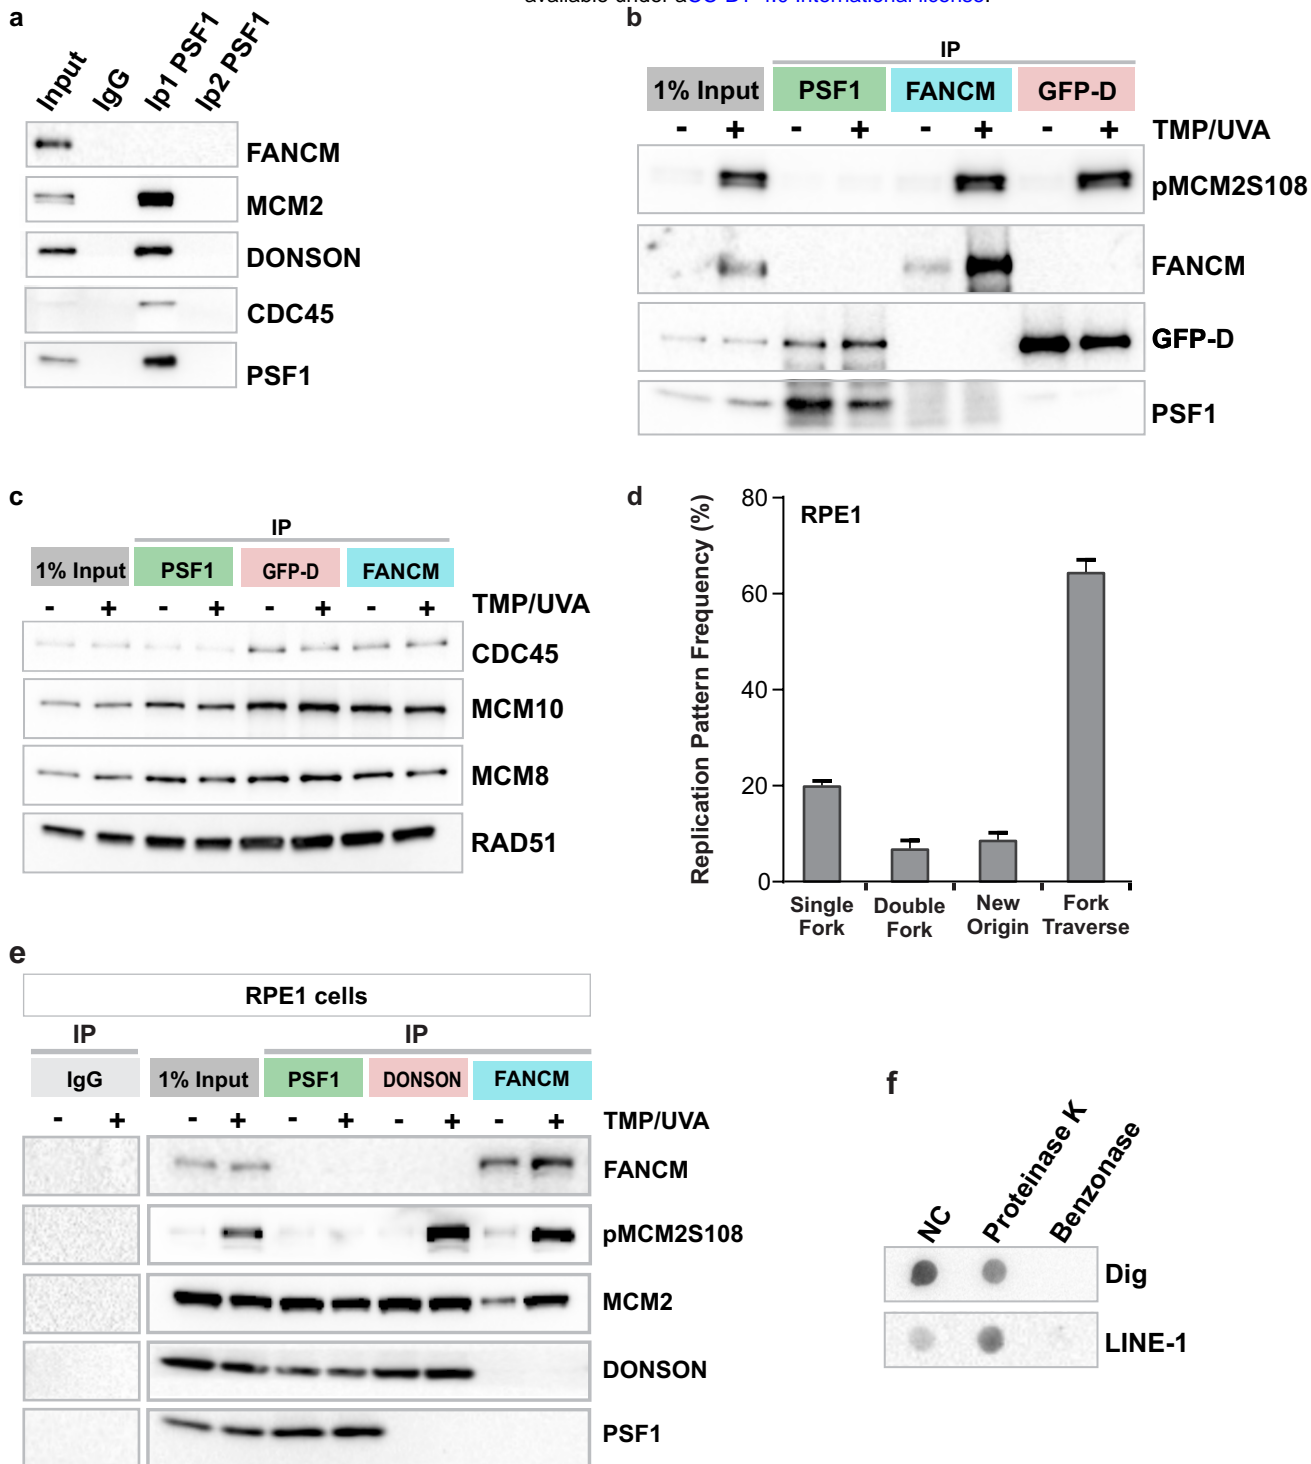

**Supplementary Figure 2: DONSON and FANCM are on different replisomes.** **a.** Efficacy of IP against the GINS protein PSF1. Chromatin proteins were incubated with antibody against PSF1 and the precipitate removed. No PSF1 was recovered when the supernatant was challenged again with the same antibody. Representative blot ( $n = 2$ ). **b.** Reversal of the order of the sequential IP of replisome components does not change the results. IP against FANCM preceded IP against GFP-DONSON. Representative blot ( $n = 2$ ). **c.** Proteins common to each replisome complex. Representative blot ( $n = 3$ ). **d.** Replication patterns in RPE1 cells containing ICLs are the same as in other cells. **e.** DONSON and FANCM are on different replisomes in RPE1 cells. **f.** Dig-TMP in sonicated chromatin is associated with DNA. To verify the covalent linkage of Dig-ICL with DNA the sonicated chromatin used for sequential IP was digested with either benzonase or proteinase K. The samples were then examined by dot blot for the Dig tag on the ICLs. Representative blot ( $n = 3$ ).

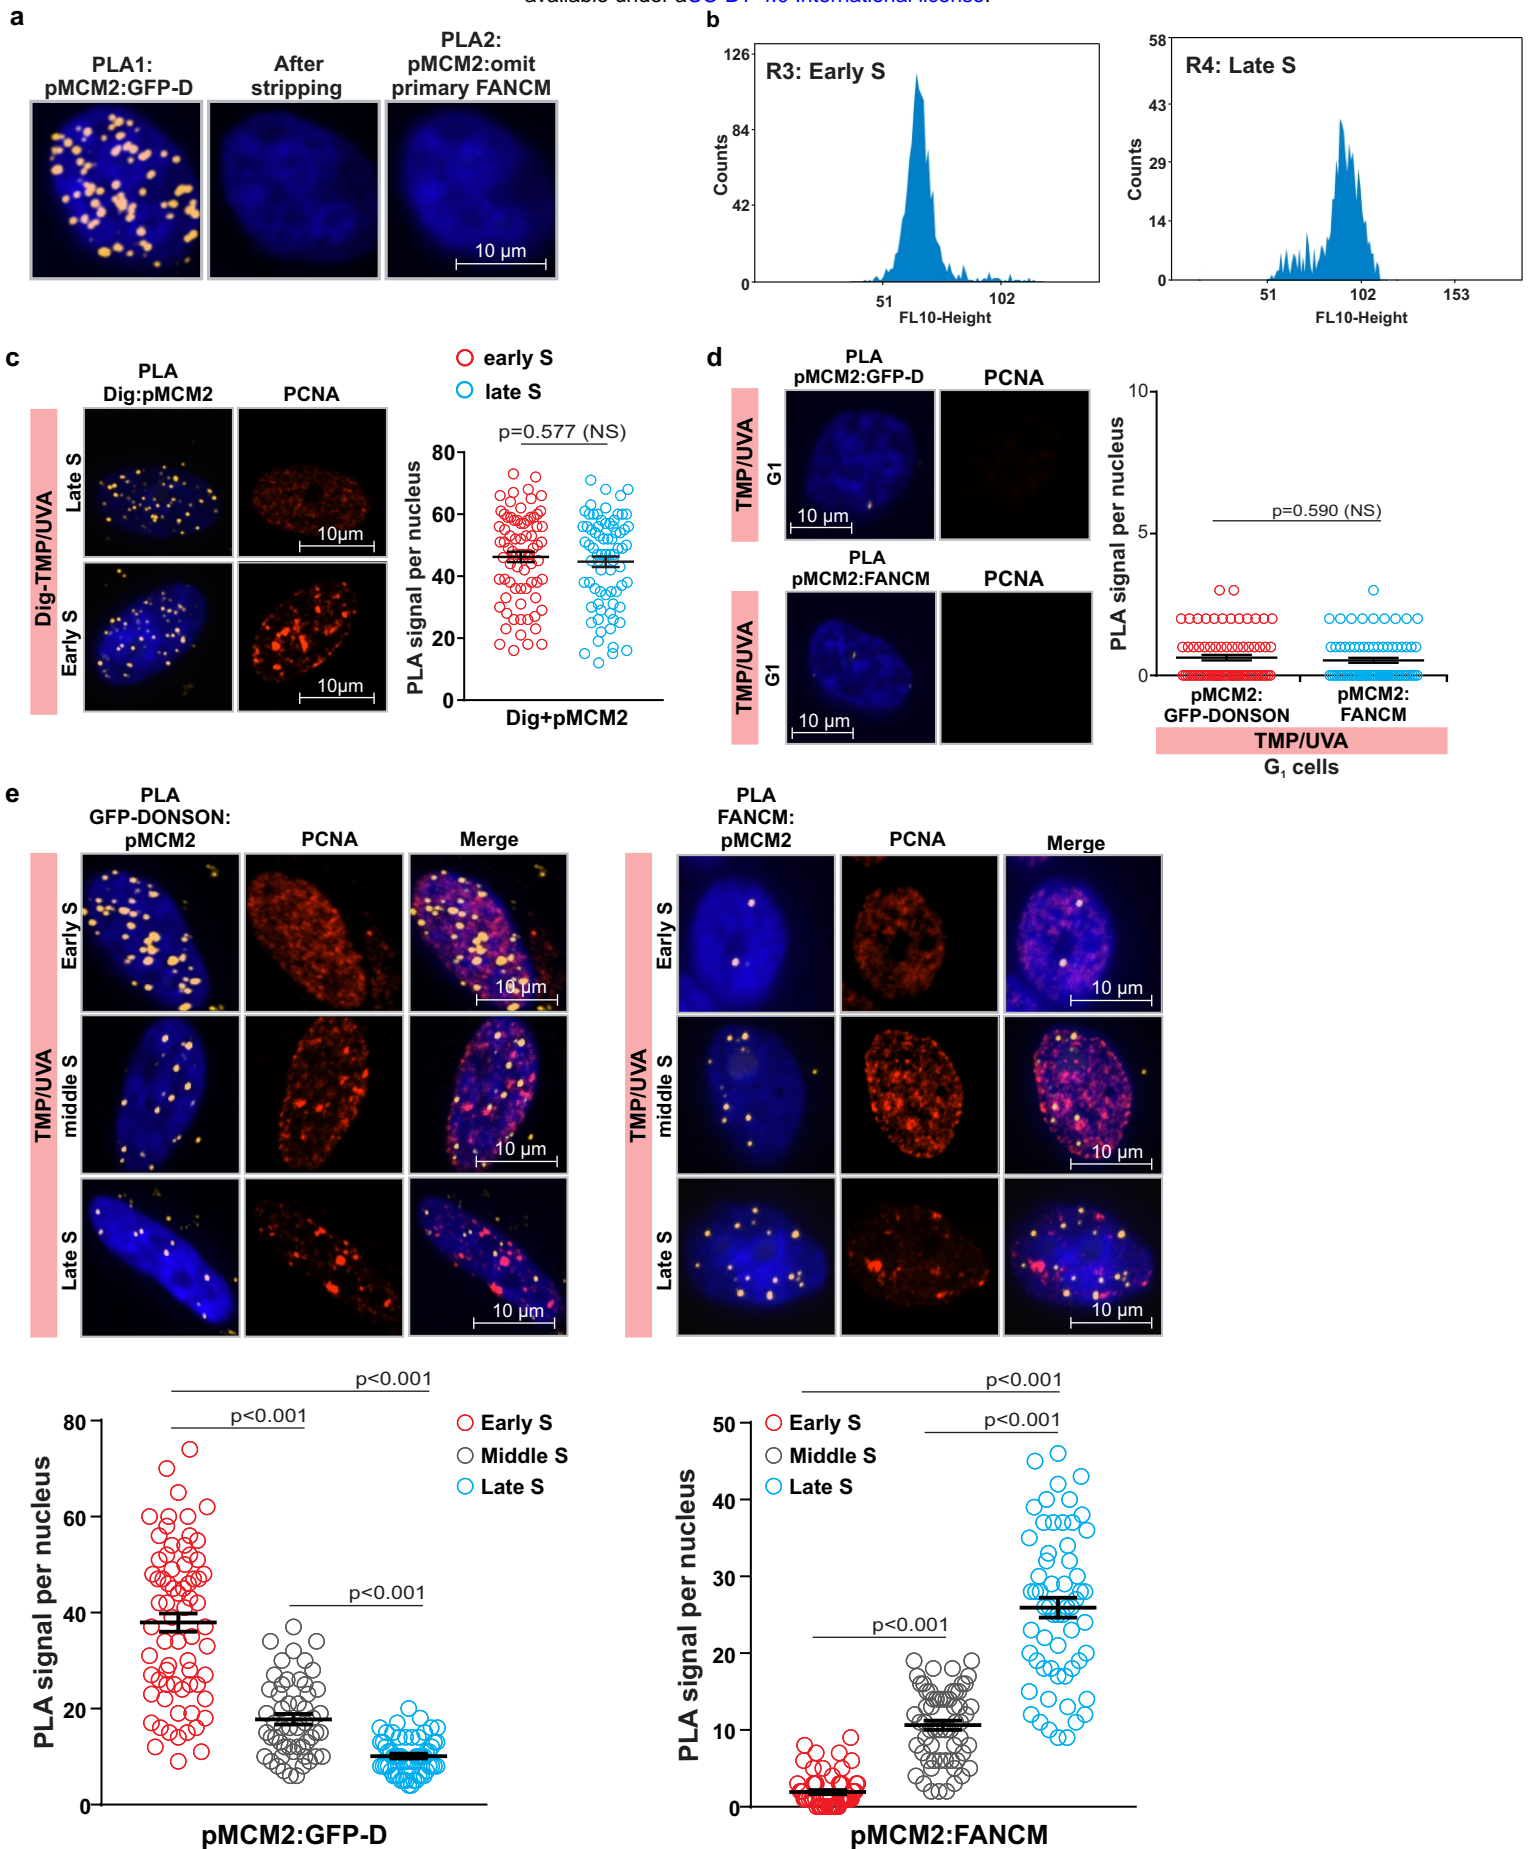

removal of the antibodies and reaction products of the first reaction, in order to avoid compromising the second reaction. The GFP-DONSON: pMCM2S108 PLA was performed. After image acquisition the cells were stripped of the components and products of the PLA and a second PLA was performed without the addition of the antibody against FANCM. The absence of signal demonstrates the efficacy of the stripping procedure. **b.** Sorted early and late S phase cells are not cross contaminated. Early and late S phase cells were recovered and re-analyzed. **c.** The frequency of replisome encounters with ICLs is similar in early and late S phase. The PLA between pMCM2 and the Dig tag on the ICLs shows equivalent frequencies in early and late S phase. **d.** Specificity test of DONSON and FANCM PLA with pMCM2S108. There can be no replisome encounters with ICLs in G1 phase cells. The PLA between GFP-DONSON or FANCM and pMCM2S108 was performed as a test of antibody and assay specificity. Scored nuclei of PLA between GFP-D and pMCM2S108= 75, FANCM and pMCM2S108= 75 from 3 biological replicates. **e.** The distinction between DONSON: pMCM2 replisomes and FANCM: pMCM2 replisomes in early and late S phase is lost in mid S phase cells. Scored nuclei: GFP-D and pMCM2S108, early S phase= 70, middle S phase= 53, late S phase= 59; FANCM and pMCM2S108, early S phase= 64, middle S phase= 61, late S phase= 60, from 3 biological replicates. Mann-Whitney Rank sum test was used to calculate the p-value for PLA experiments. Data are mean  $\pm$  s.e.m. NS, not significant:  $p > 0.05$ .



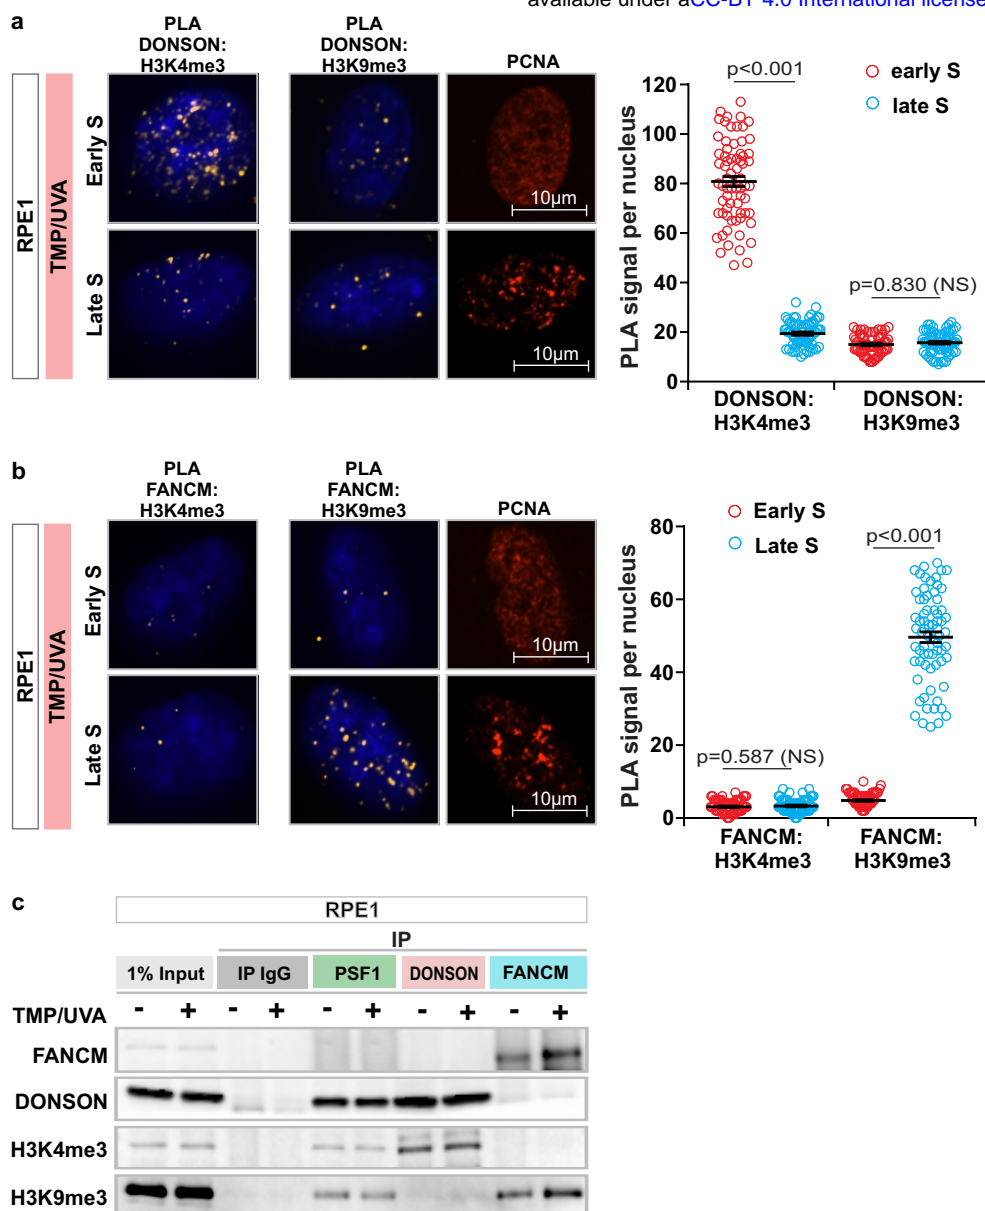

**Supplementary Figure 4: Association of DONSON and FANCM with H3K4m3 and H3K9me3 in RPE1 cells.** RPE1 cells were treated with TMP/UVA and PLA between endogenous DONSON or FANCM and H3K4me3 or H3K9me3 performed. Signals were quantitated in early or late S phase cells. **a.** The association of DONSON with H3K4me3 is greater in early S phase cells than in late S phase. The interaction of DONSON with H3K9me3 is low in both early and late S phase cells. Scored nuclei: DONSON and H3K4me3, early S phase= 62, late S phase= 64; DONSON and H3K9me3, early S phase= 63, late S phase= 60, from 3 biological replicates. **b.** The association of FANCM with H3K4me3 is low in both early and late S phase, while that with H3K9me3 is much stronger in late than in early S phase. Scored nuclei: FANCM and H3K4me3, early S phase= 69, late S phase= 70; DONSON and H3K9me3, early S phase= 73, late S phase= 70, from 3 biological replicates. **c.** Cells were exposed to UVA or TMP/UVA. Sequential IP reveals greater association of DONSON with H3K4me3 than H3K9me3, and greater association of FANCM with H3K9me3 than H3K4me3. Mann-Whitney Rank sum test was used to calculate the p-value for PLA experiments. Data are mean  $\pm$  s.e.m. NS, not significant:  $p > 0.05$ .

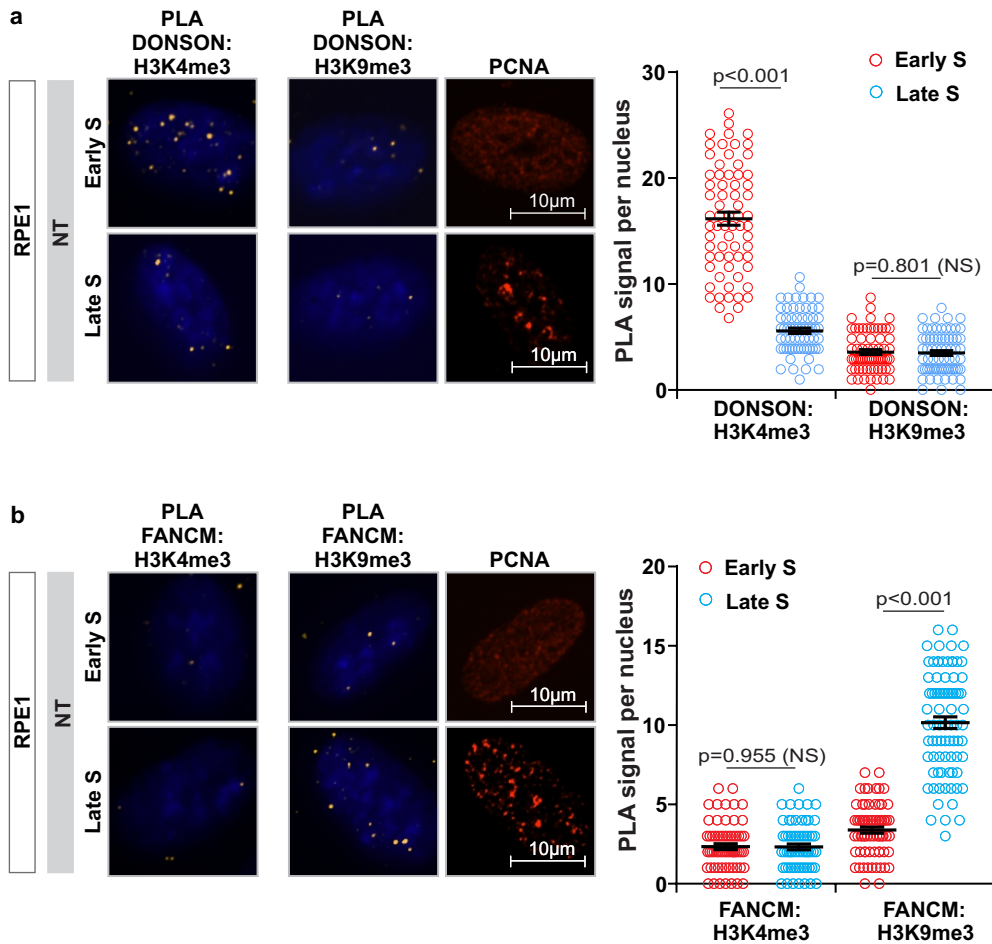

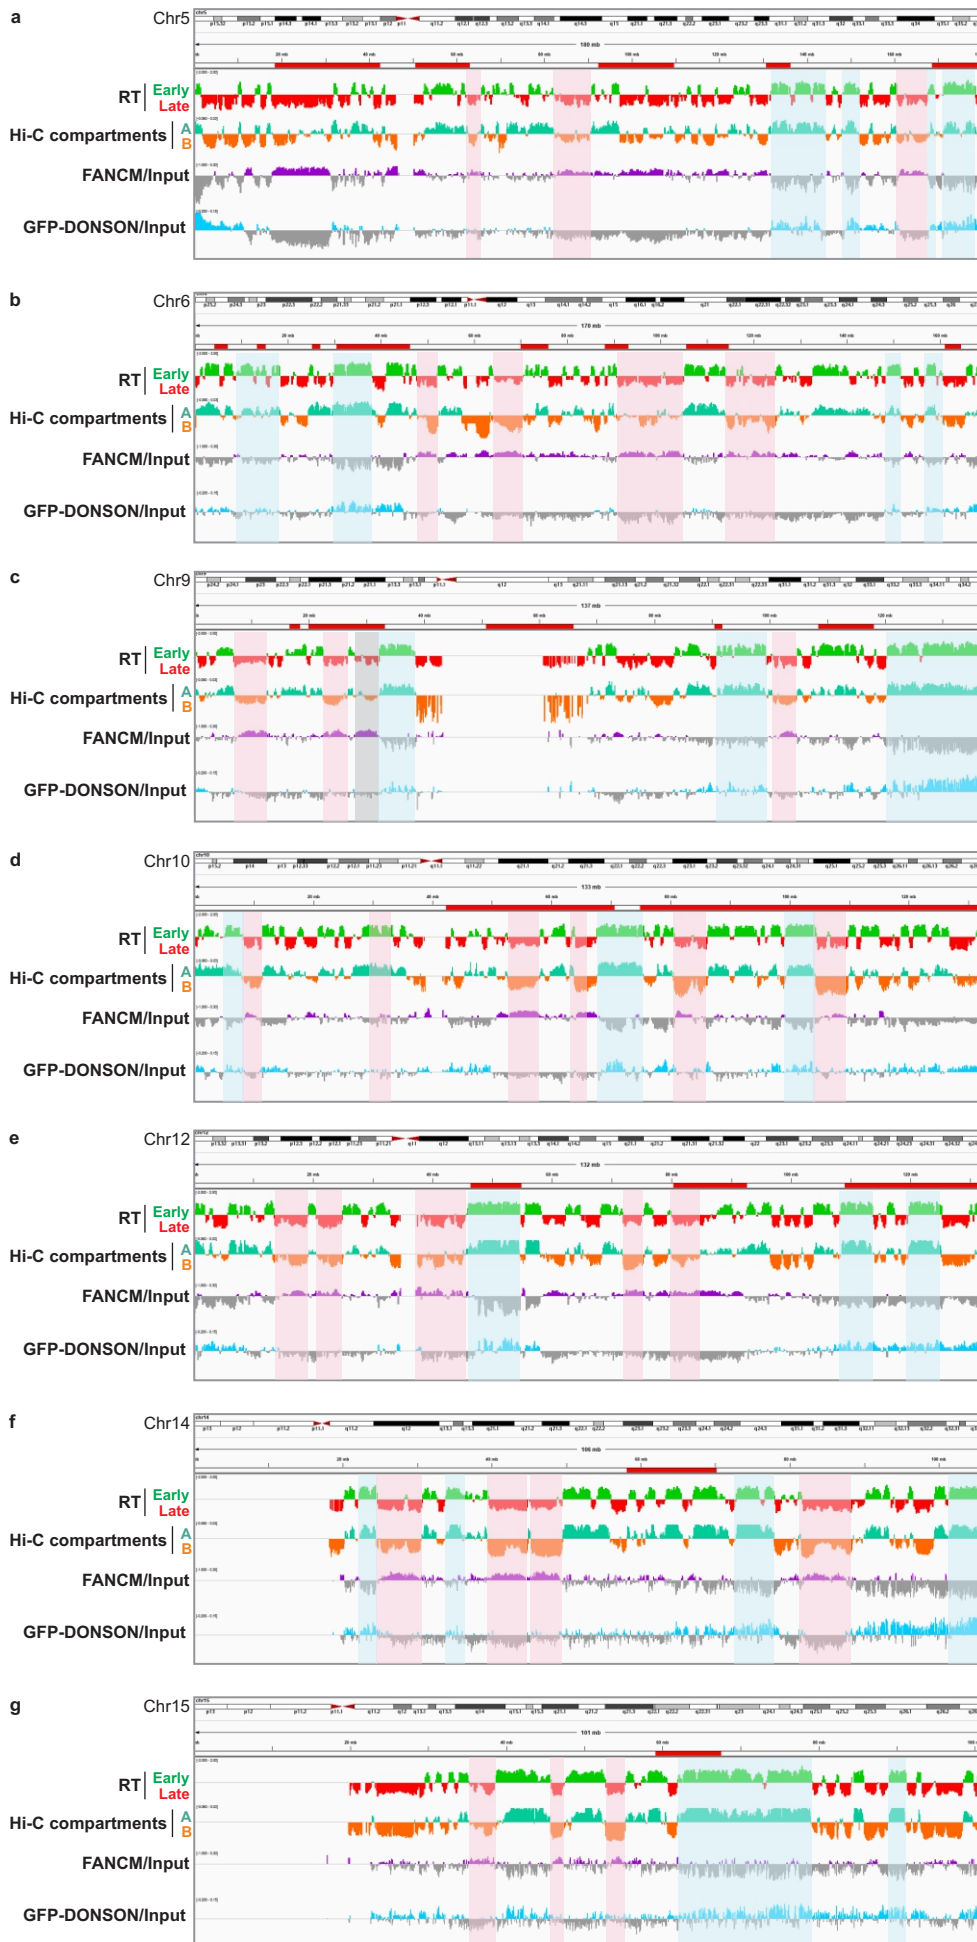

**Supplementary Figure 6: CHIP-seq distribution profiles for selected chromosomes.** Correlations between FANCM and late replicating regions and chromatin compartment B are indicated in pink. Correlations of DONSON with early replicating regions and chromatin compartment A are indicated in blue. **a.** Chr 5. **b.** Chr 6. **c.** Chr 9. **d.** Chr 10. **e.** Chr 12. **f.** Chr 14. **g.** Chr 15.
